# Supplementary material for: Zn(ii) phthalocyanines tetra substituted by aryl and alkyl azides: design, synthesis and optical detection of H2S
Source: Royal Society of Chemistry journal article supplement (doi:10.1039/d0nj00383b), 2020-01-01
Supplement: d0nj00383b1.pdf [file d0nj00383b1.pdf]

# **Zn(II) phthalocyanines Tetra Substituted by Aryl and Alkyl Azides: Design, Synthesis and Optical Detection of H<sub>2</sub>S**

## **Electronic Supplementary Information**

**Mohamad Albakour<sup>a</sup>, Merve Zeyrek Ongun<sup>b</sup>, Sevinc Zehra Topal<sup>a,\*</sup>, Ayşe Gül Gürek<sup>a,\*</sup>**

<sup>a</sup> *Gebze Technical University, Department of Chemistry, 41400 Gebze, Kocaeli, Turkey*

<sup>b</sup> *Dokuz Eylül University, Chemistry Technology Program, Izmir Vocational High School, 35160, Izmir, Turkey*

# Table of Contents

## EXPERIMENTAL

**Fig. S1.** FT-IR spectrum of 4- azido phthalonitrile (**2**)

**Fig. S2** <sup>1</sup>H- NMR spectrum of 4- azido phthalonitrile (**2**) in CDCl<sub>3</sub>

**Fig. S3** <sup>13</sup>C- NMR spectrum of 4- azido phthalonitrile (**2**) in CDCl<sub>3</sub> (A) full spectra (B) the spectra between 150 and 100 ppm

**Fig. S4** Mass spectrum of 4- azido phthalonitrile (**2**)

**Fig. S5** FT-IR spectrum of tetra 2,9(10),16(17),23(24) azido phthalocyaninato zinc (II) (**3**)

**Fig. S6** <sup>1</sup>H- NMR spectrum of tetra 2,9(10),16(17),23(24) azido phthalocyaninato zinc (II) (**3**) in THF-*d*<sub>8</sub>

**Fig. S7** <sup>13</sup>C- NMR spectrum of tetra 2,9(10),16(17),23(24) azido phthalocyaninato zinc (II) (**3**) in THF-*d*<sub>8</sub>

**Fig. S8** Mass spectrum of tetra 2,9(10),16(17),23(24) azido phthalocyaninato zinc (II) (**3**)

**Fig. S9** FT-IR spectrum of 4 -(6-hydroxyhexylsulfanyl)-1,2-dicyanobenzene (**4**)

**Fig. S10** <sup>1</sup>H-NMR spectrum of 4 -(6-hydroxyhexylsulfanyl)-1,2-dicyanobenzene (**4**) in CDCl<sub>3</sub>

**Fig. S11** <sup>13</sup>C-NMR spectrum of 4 -(6-hydroxyhexylsulfanyl)-1,2-dicyanobenzene (**4**) in CDCl<sub>3</sub>

**Fig. S12** Mass spectrum of 4 -(6-hydroxyhexylsulfanyl)-1,2-dicyanobenzene (**4**)

**Fig. S13** FT-IR spectrum of 4 -(6-methanesulfonatehexylsulfanyl)-1,2-dicyanobenzene (**5**)

**Fig. S14** <sup>1</sup>H-NMR spectrum of 4 -(6-methanesulfonatehexylsulfanyl)-1,2-dicyanobenzene (**5**)

**Fig. S15** <sup>13</sup>C-NMR spectrum of 4 -(6-methanesulfonatehexylsulfanyl)-1,2-dicyanobenzene (**5**)

**Fig. S16** Mass spectrum of 4 -(6-methanesulfonatehexylsulfanyl)-1,2-dicyanobenzene (**5**)

**Fig. S17** FT-IR spectrum of 4 -(6-azidohexylsulfanyl)-1,2-dicyanobenzene (**6**)

**Fig. S18** <sup>1</sup>H-NMR spectrum of 4 -(6-azidohexylsulfanyl)-1,2-dicyanobenzene (**6**)

**Fig. S19** <sup>13</sup>C-NMR spectrum of 4 -(6-azidohexylsulfanyl)-1,2-dicyanobenzene (**6**)

**Fig. S20** Mass spectrum of 4 -(6-azidohexylsulfanyl)-1,2-dicyanobenzene (**6**)

**Fig. S21** FT-IR spectrum of compound **7**

**Fig. S22** mass spectrum of compound **7**

**Fig. S23** <sup>1</sup>H-NMR spectrum of compound **7**

**Fig. S24** <sup>13</sup>C-NMR spectrum of compound **7**

**Fig. S25** <sup>1</sup>H-NMR spectrum of compound **7** in THF-*d*<sub>8</sub>

**Fig. S26** <sup>13</sup>C-NMR spectrum of compound **7** in THF-*d*<sub>8</sub>

**Fig. S27** Absorption spectra of **3** in DMF, pyridine, THF and DMSO at the same concentration ( $10^{-5}$  M).

**Fig. S28** Absorption spectra of **7** in DMF, pyridine, THF and DMSO at the same concentration ( $10^{-5}$  M).

**Fig. S29** UV-Vis spectra of compound **3** at the different concentrations in DMSO.

**Fig. S30** UV-Vis spectra of compound **7** at the different concentrations in DMSO

**Fig. S31** Fluorescence integrate area vs absorbance of **3**, **7** and **ZnPc** in DMSO to determine their  $\Phi_F$  values

**Fig. S32** Determination of singlet oxygen quantum yield of **3** in DMSO. Inset: Plot of DPBF absorbance at 417 nm

**Fig. S33** Determination of singlet oxygen quantum yield of **7** in DMSO. Inset: Plot of DPBF absorbance at 417 nm

**Fig. S34** Determination of singlet oxygen quantum yield of **ZnPc** in DMSO. Inset: Plot of DPBF absorbance at 417 nm

**Fig. S35** Changes in the absorption spectra of compound **7** ( $5.0 \times 10^{-7}$  M) in DMSO by the addition of hydrogen sulfide ( $\text{Na}_2\text{S} \cdot 9\text{H}_2\text{O}$  in HEPES/ DMSO (5:5, pH= 7.0)).

**Fig. S36** Changes in the emission spectra of compound **7** ( $5.0 \times 10^{-7}$  M) in DMSO by the addition of hydrogen sulfide ( $\text{Na}_2\text{S} \cdot 9\text{H}_2\text{O}$  in HEPES/ DMSO (5:5, pH= 7.0))

**Fig. S37** Proposed mechanism for reduction of azide group to amine group [1,2].

**Fig. S38** MALDI-TOF mass spectrum of 2,9(10),16(17),23(24) (amino) phthalocyaninato zinc (II) (**Pc-NH<sub>2</sub>**). It is obtained the reaction of 500  $\mu\text{M}$  compound **3** with 10 mM  $\text{Na}_2\text{S}$

**Synthesis of tetra 2,9(10),16(17),23(24) (amino) phthalocyaninato zinc (II) (Pc-NH<sub>2</sub>)**

**Fig. S39** FT-IR spectrum of 2,9(10),16(17),23(24) (amino) phthalocyaninato zinc (II) (**Pc-NH<sub>2</sub>**)

**Fig. S40**  $^1\text{H-NMR}$  spectrum of 2,9(10),16(17),23(24) (amino) phthalocyaninato zinc (II) (**Pc-NH<sub>2</sub>**) in  $\text{DMSO-}d_6$

**Fig. S41** MALDI-TOF mass spectrum of 2,9(10),16(17),23(24) (amino) phthalocyaninato zinc (II) (**Pc-NH<sub>2</sub>**) (matrix: DIT)

## EXPERIMENTAL

### Fluorescence Quantum Yield Determination

Fluorescence quantum yield values ( $\Phi_F$ ) were determined by the comparative William's method [15]. Accordingly, the UV-Vis absorption and corrected emission spectra at different concentrations of the reference standard (ZnPc) and samples were measured under identical conditions. Note that the absorbance value at the excitation wavelength was used. Integrated fluorescence intensities (the area of the fluorescence emission spectrum) versus absorbance for using reference molecule **ZnPc** ( $\Phi_F = 0.18$  in DMSO [16]) and samples were plotted. Quantum yield ( $\Phi_F$ ) values were calculated according to Eq. 1. Grad was the gradient of the plot, and the gradients of the plots were proportional to the quantum yield of the samples.

$$\Phi_F = \Phi_F^{Std} \left( \frac{Grad}{Grad_{Std}} \right) \quad (\text{Eq. 1})$$

### Singlet Oxygen Quantum Yield Determination

Singlet oxygen quantum yields ( $\Phi_\Delta$ ) of the molecules were determined by indirect measurement based on the quenching of the absorbance of DPBF by singlet oxygen generated by the Pc irradiation. **ZnPc** was used as a reference ( $\Phi_\Delta = 0.67$  in DMSO). DPBF degradation at 417 nm was monitored by UV-Vis spectroscopy. The solutions of photosensitizers containing DPBF ( $\sim 1 \times 10^{-5}$  M) were prepared in the dark and irradiated in the Q band region. The light intensity of  $7.05 \times 10^{15}$  photons  $s^{-1} cm^{-2}$  was used for  $\Phi_\Delta$  determinations. Singlet oxygen quantum yields were calculated using the Equation 2:

$$\Phi_\Delta = \Phi_\Delta^{Std} \frac{R \cdot I_{Abs}^{Std}}{R \cdot I_{Abs}} \quad (\text{Eq. 2})$$

In the equation,  $R$  and  $R_{std}$  were DPBF photobleaching rates in the presence of the respective samples and standard, respectively, while  $I_{abs}$  and  $I_{abs}^{std}$  were the rates of light absorption by the samples and standard, respectively.

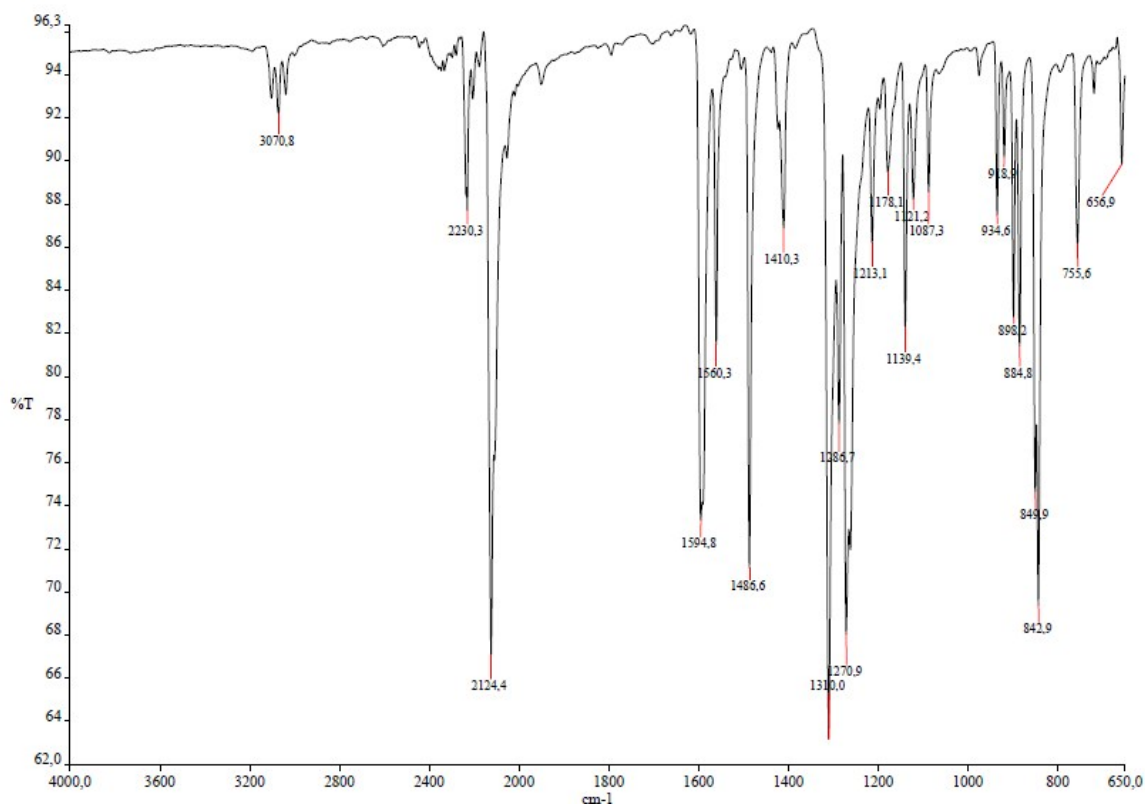

**Fig. S1** FT-IR spectrum of 4- azido phthalonitrile (**2**)

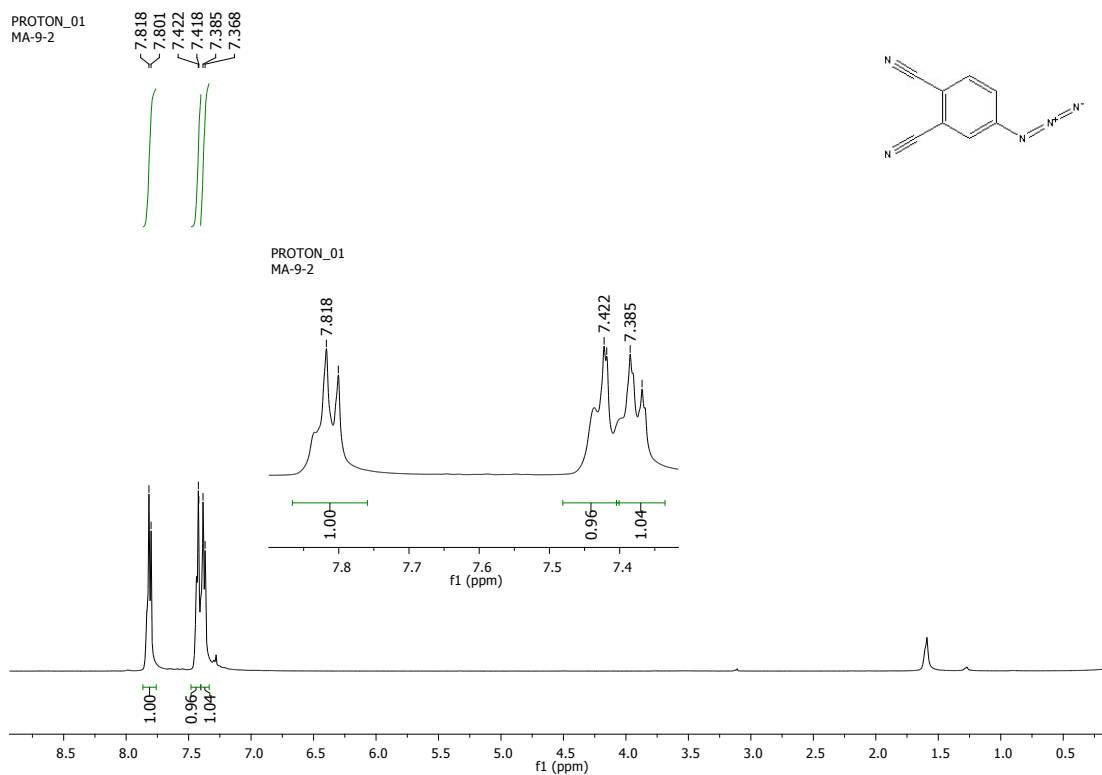

**Fig. S2**  $^1\text{H}$ -NMR spectrum of 4- azido phthalonitrile (**2**) in  $\text{CDCl}_3$

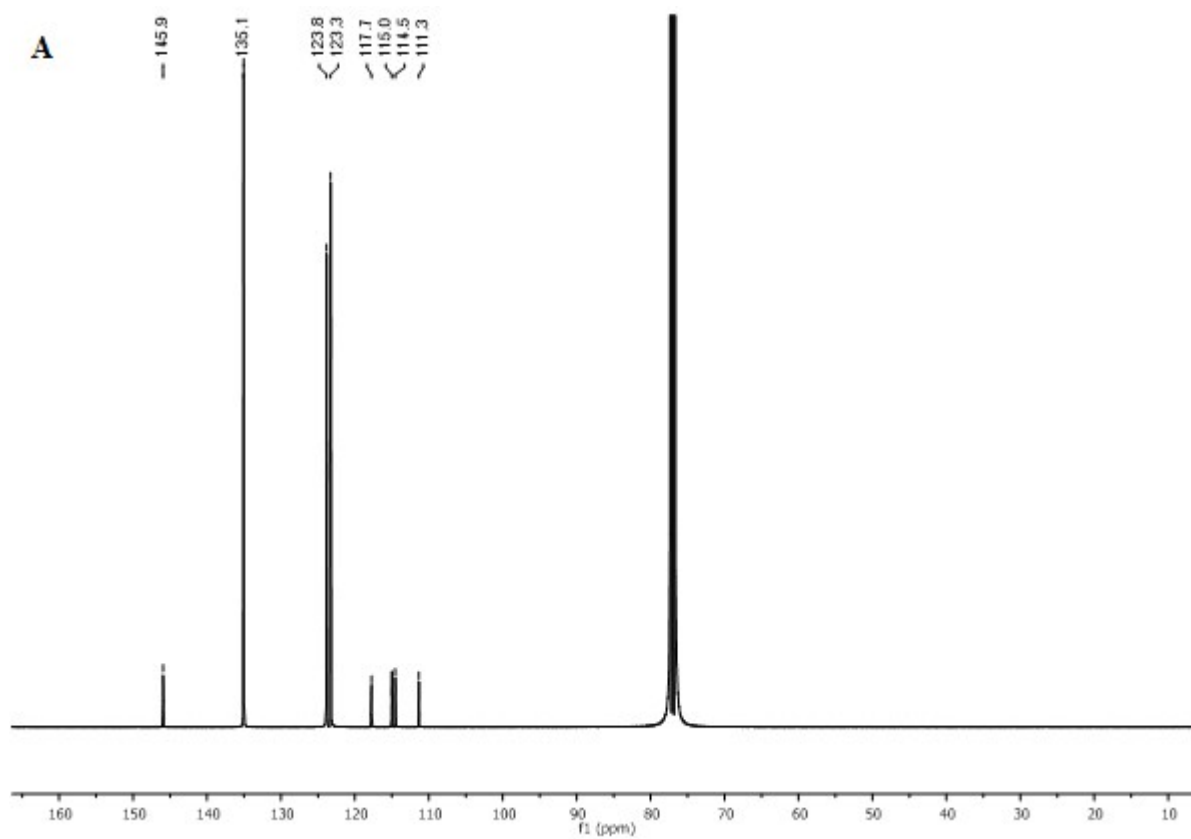

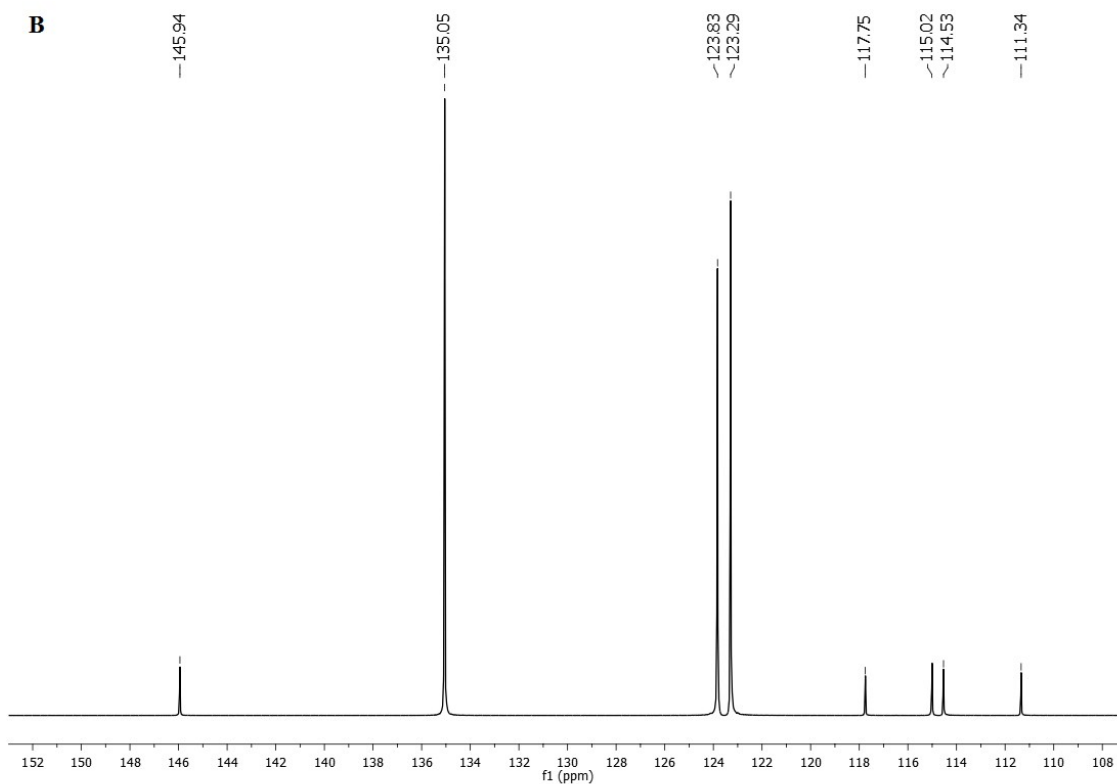

**Fig. S3**  $^{13}\text{C}$ - NMR spectrum of 4- azido phthalonitrile (**2**) in  $\text{CDCl}_3$  (A) full spectra (B) the spectra between 150 and 100 ppm

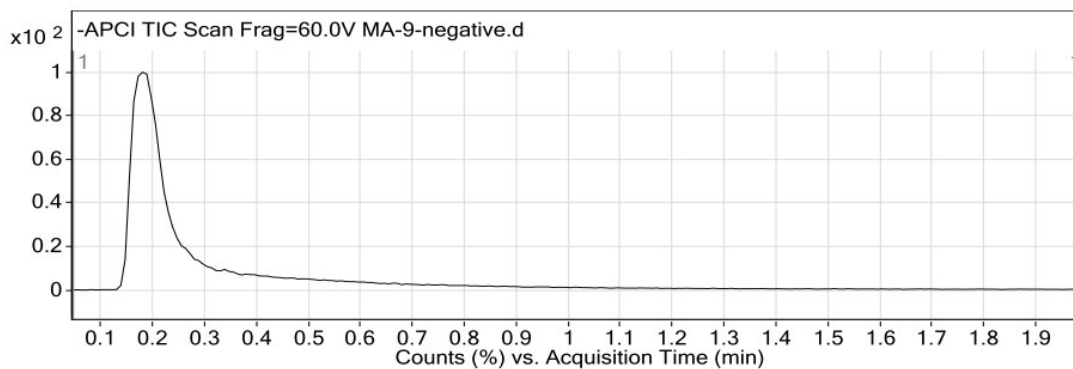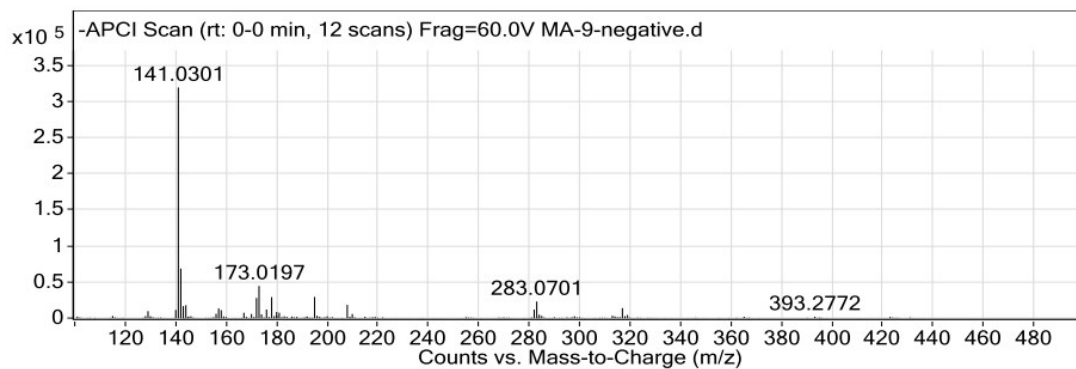

**Fig. S4** Mass spectrum of 4- azido phthalonitrile (**2**)

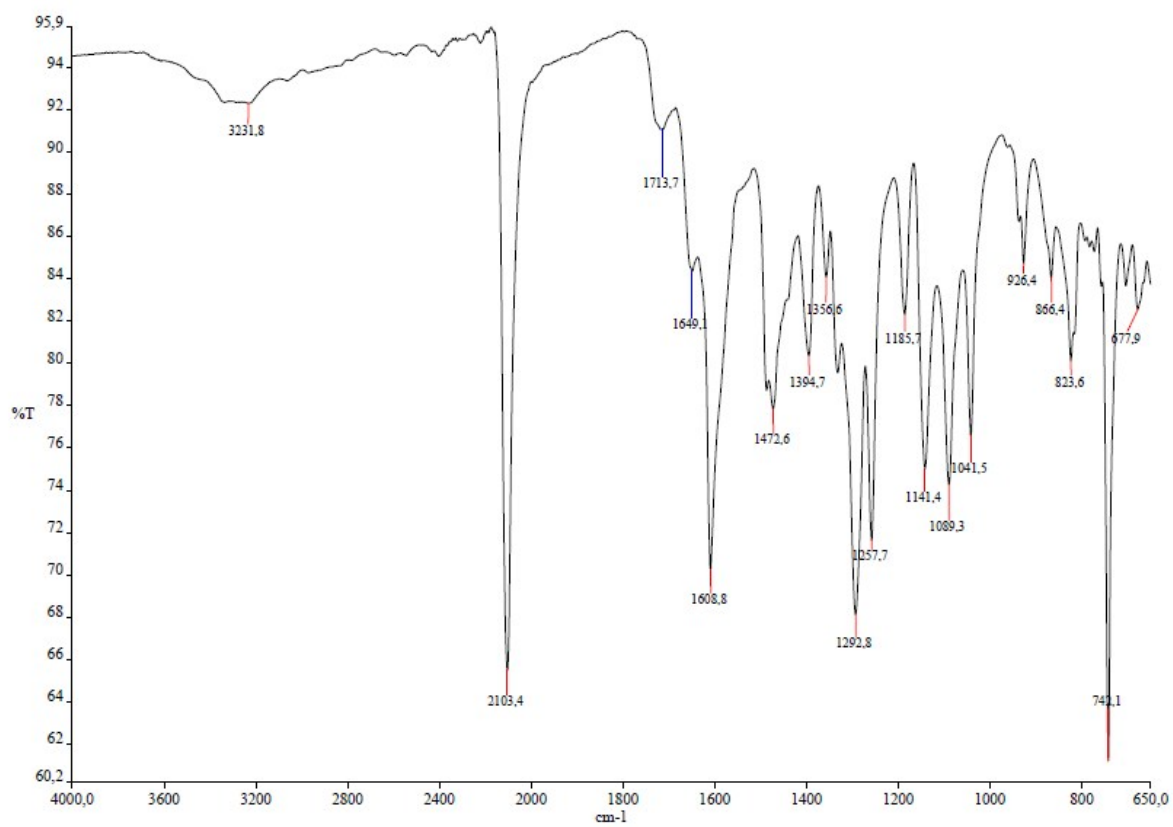

**Fig. S5** FT-IR spectrum of tetra 2,9(10),16(17),23(24) azido phthalocyaninato zinc (II) (**3**)

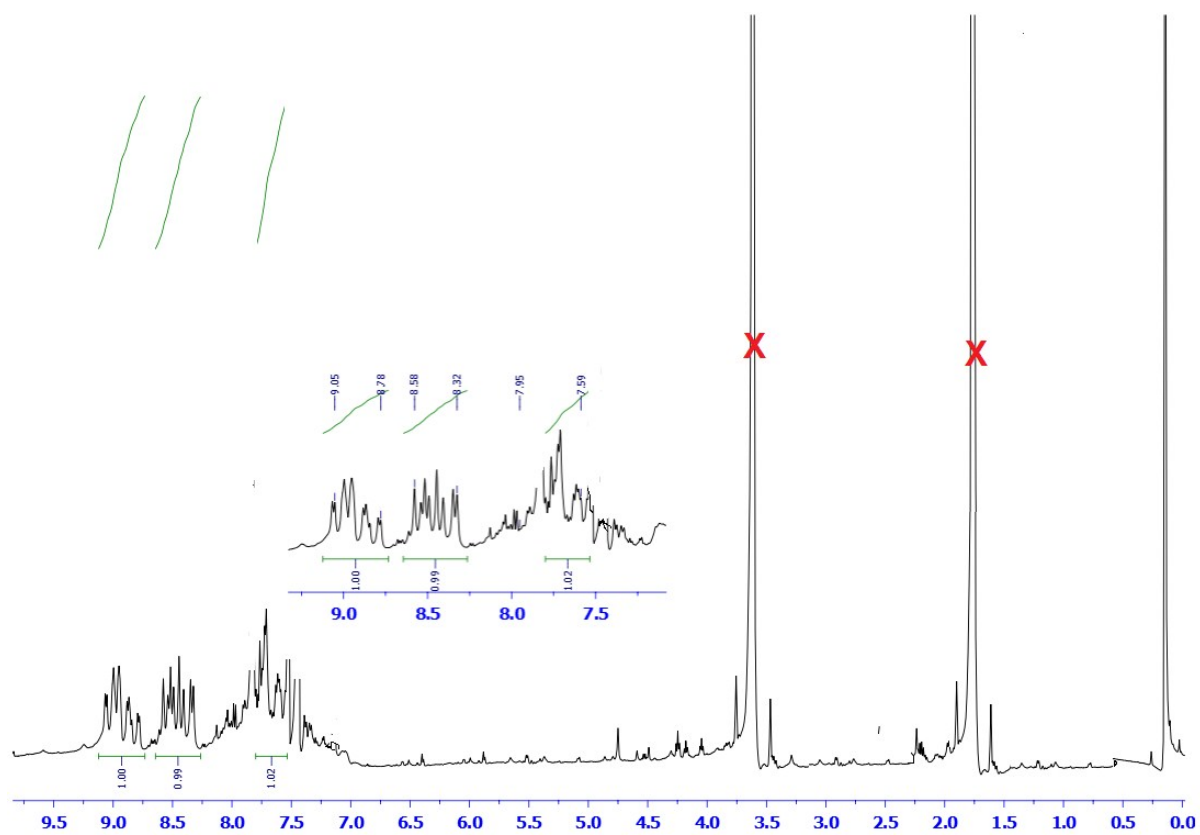



**Fig. S6**  $^1\text{H}$ - NMR spectrum of tetra 2,9(10),16(17),23(24) azido phthalocyaninato zinc (II) (**3**) in  $\text{THF-}d_8$

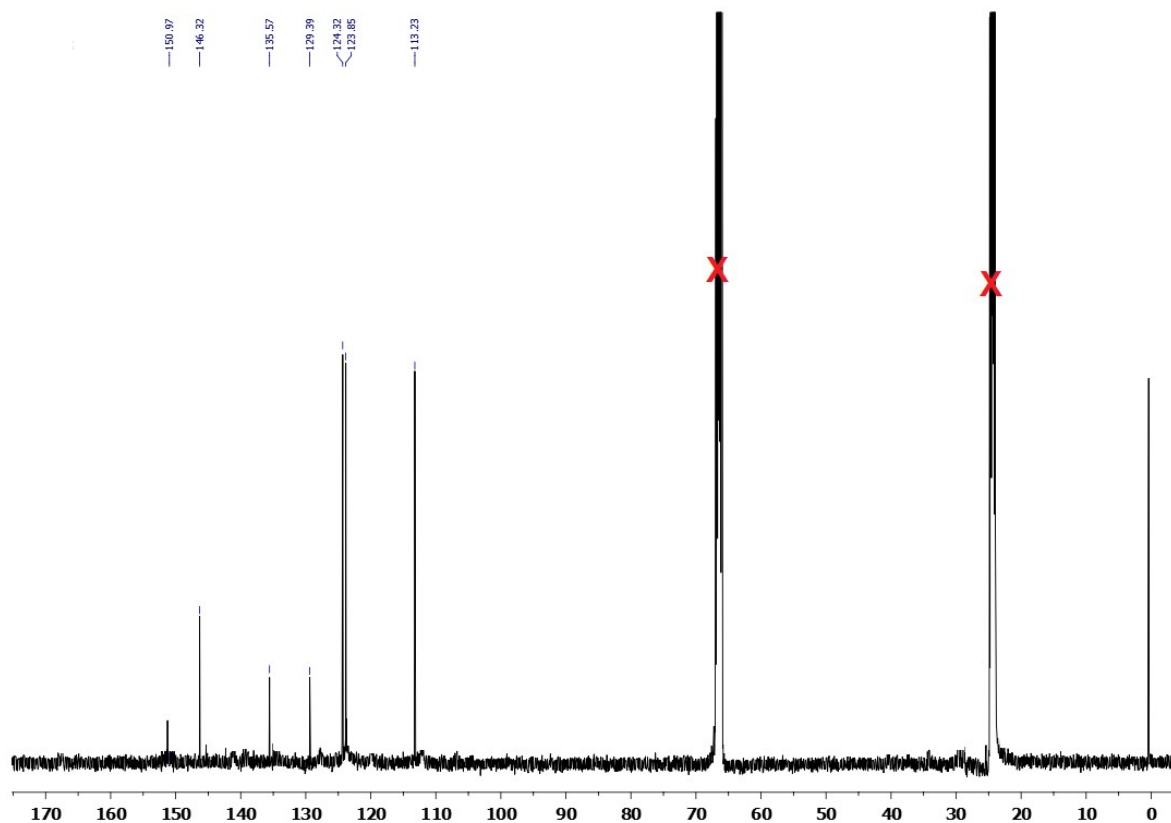

**Fig. S7**  $^{13}\text{C}$ - NMR spectrum of tetra 2,9(10),16(17),23(24) azido phthalocyaninato zinc (II) (**3**) in  $\text{THF-}d_8$

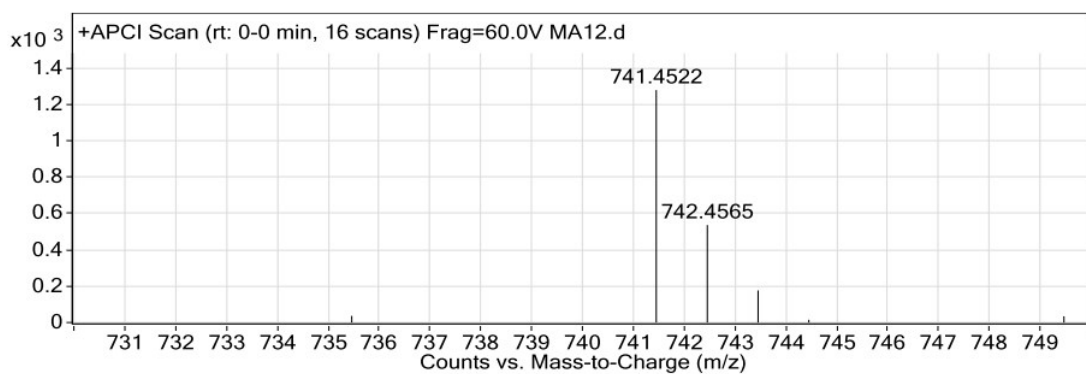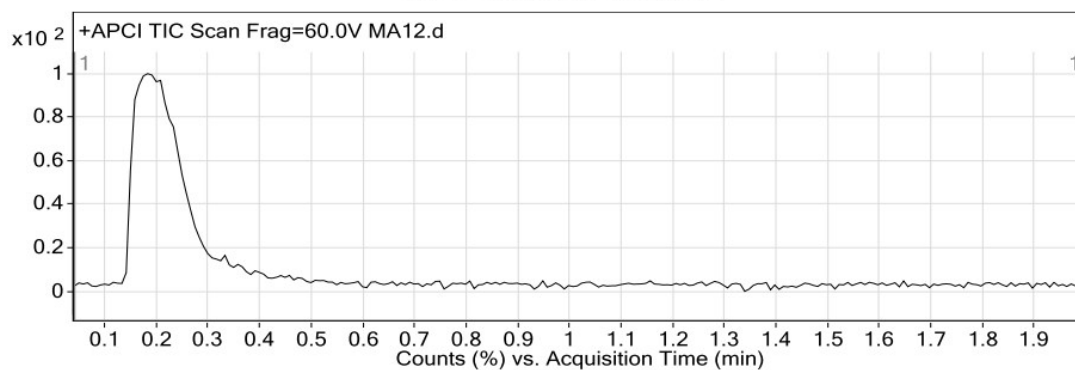

**Fig. S8** Mass spectrum of tetra 2,9(10),16(17),23(24) azido phthalocyaninato zinc (II) (**3**)

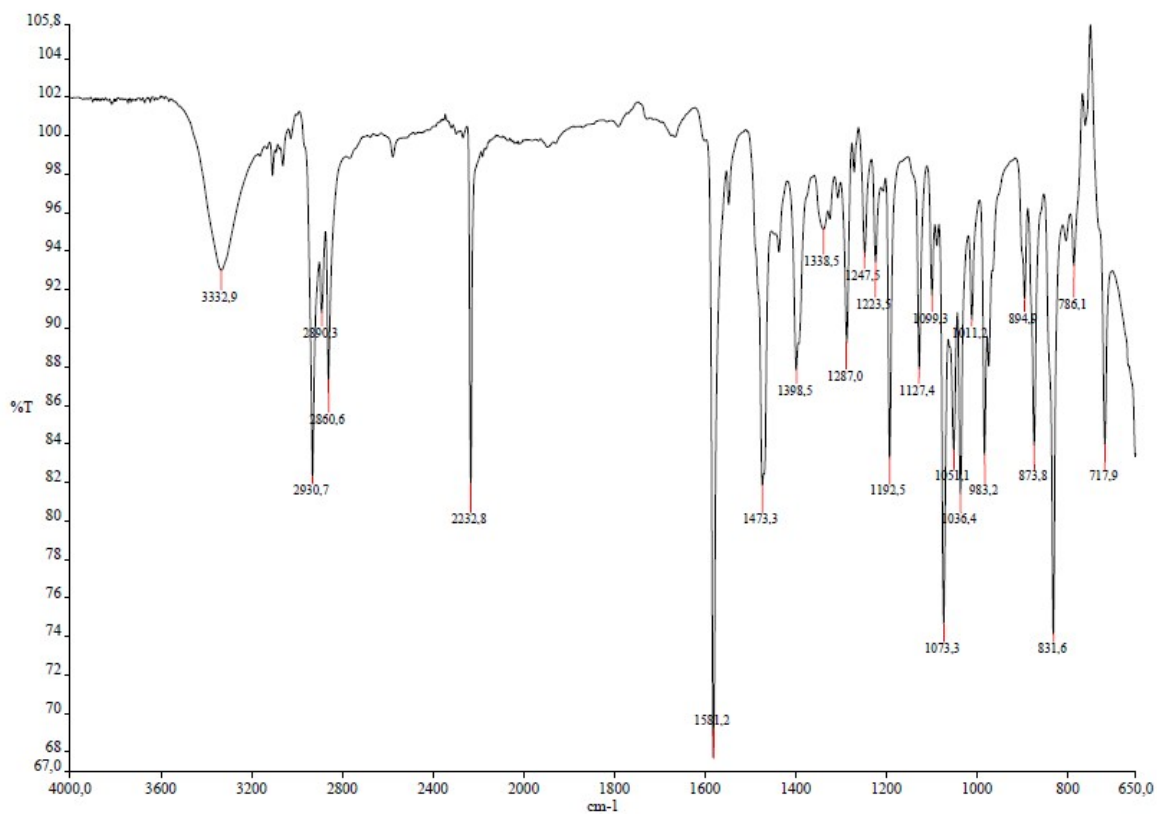

**Fig. S9** FT-IR spectrum of 4-(6-hydroxyhexylsulfanyl)-1,2-dicyanobenzene (**4**)

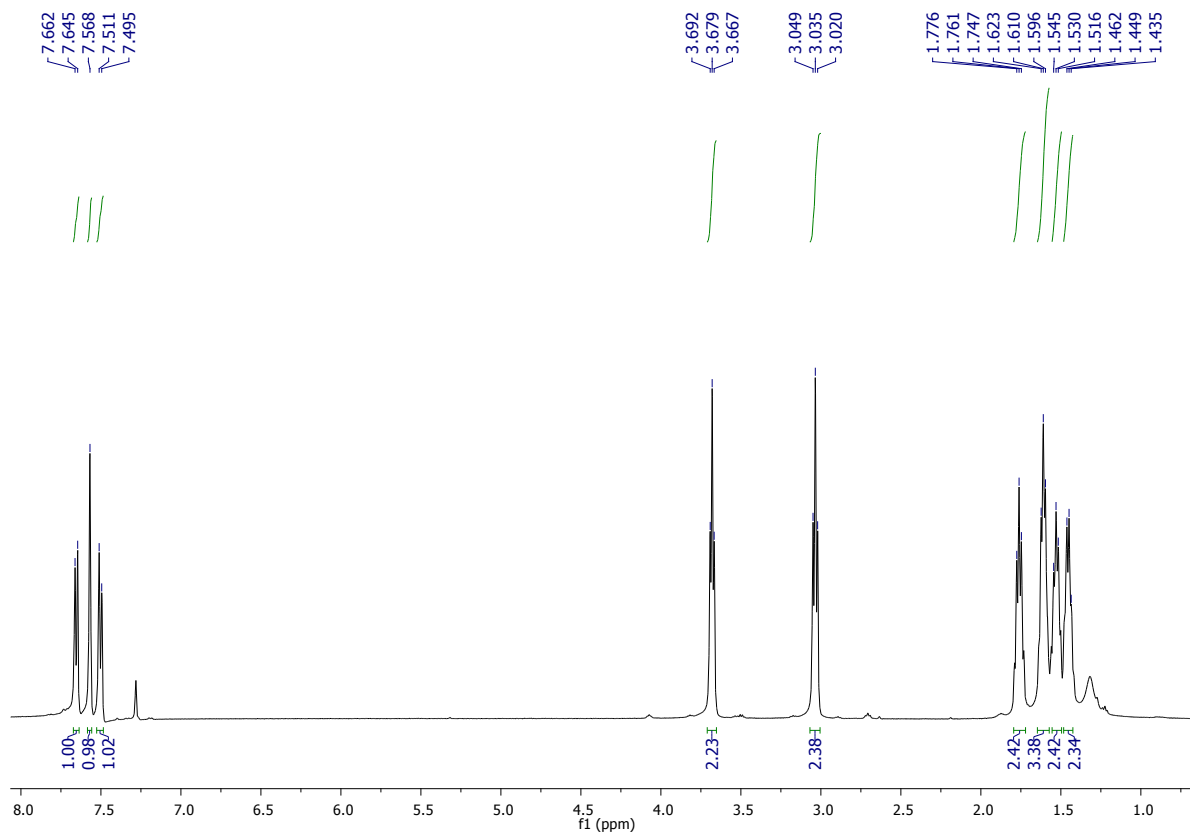

**Fig. S10** <sup>1</sup>H-NMR spectrum of 4-(6-hydroxyhexylsulfanyl)-1,2-dicyanobenzene (**4**) in CDCl<sub>3</sub>

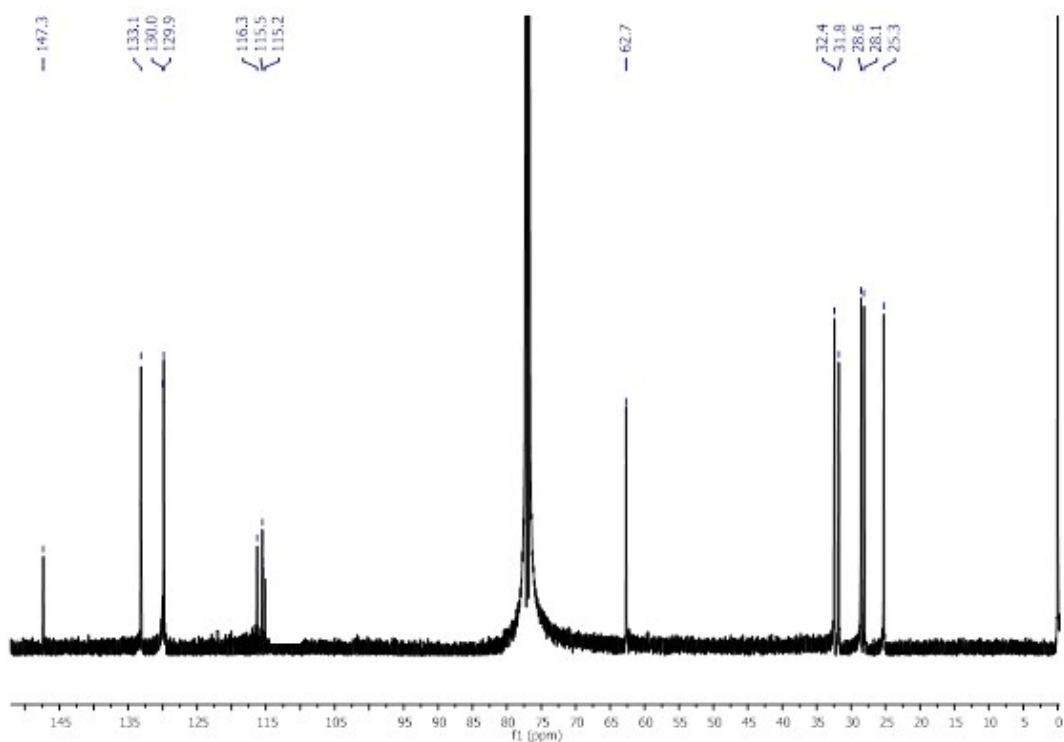

**Fig. S11**  $^{13}\text{C}$ -NMR spectrum of 4-(6-hydroxyhexylsulfanyl)-1,2-dicyanobenzene (**4**) in  $\text{CDCl}_3$

MA\_27 #75 RT: 1.49 AV: 1 NL: 4.60E7  
T: + c ESI Q1MS [100.000-400.000]

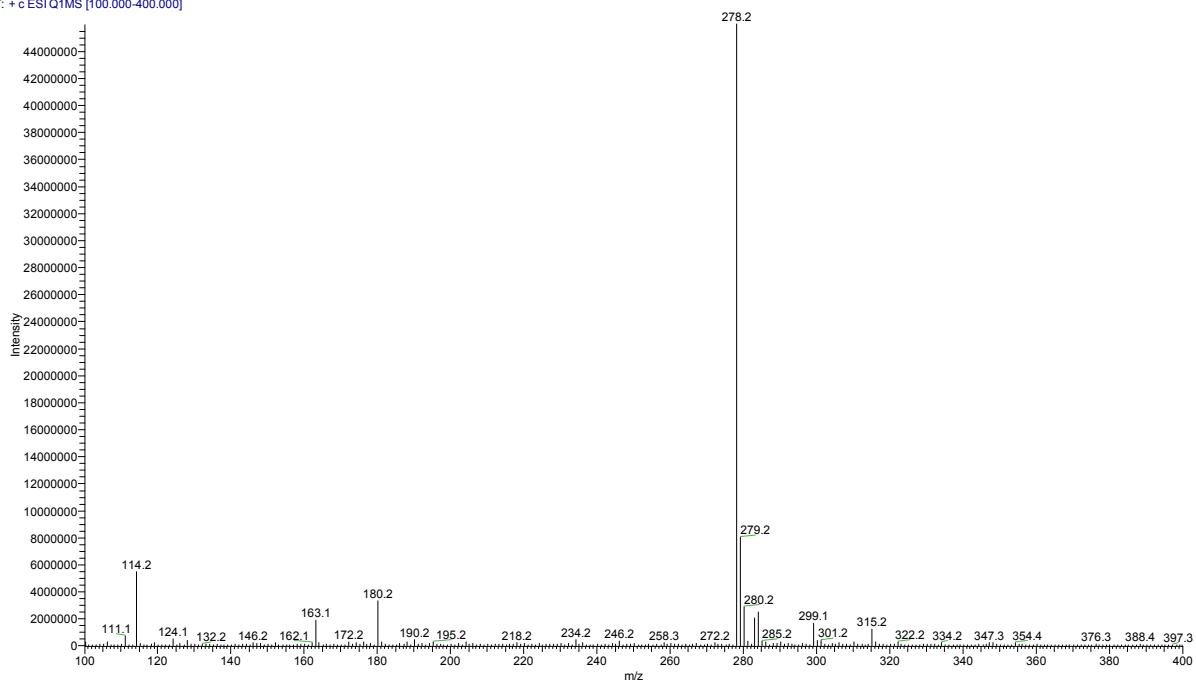

**Fig. S12** Mass spectrum of 4-(6-hydroxyhexylsulfanyl)-1,2-dicyanobenzene (**4**)

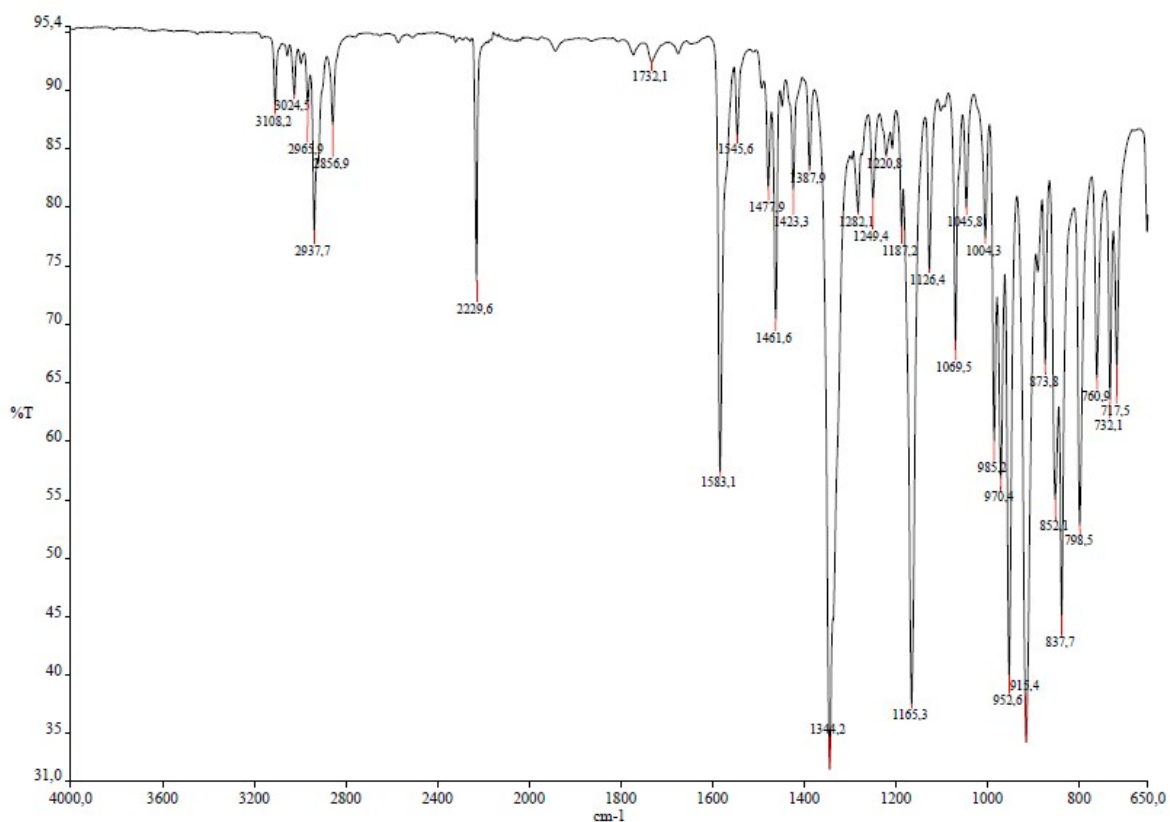

**Fig. S13** FT-IR spectrum of 4-(6-methanesulfonatehexylsulfanyl)-1,2-dicyanobenzene (**5**)

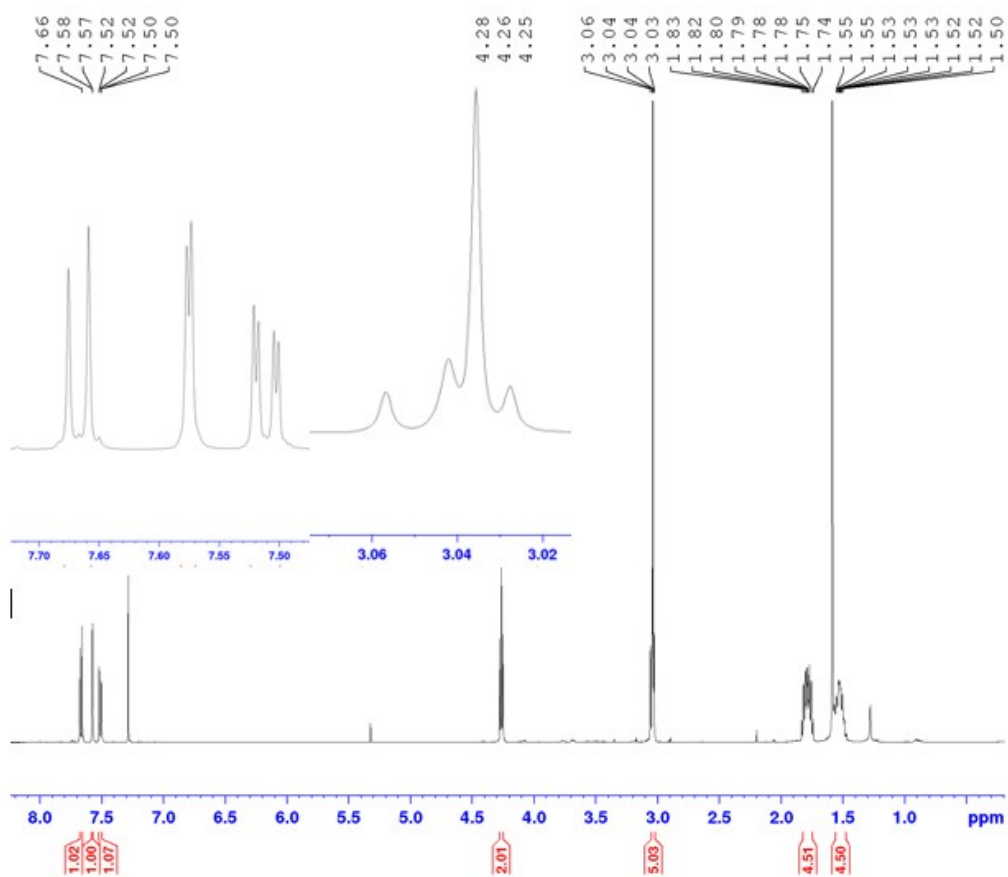

**Fig. S14** <sup>1</sup>H-NMR spectrum of 4-(6-methanesulfonatehexylsulfanyl)-1,2-dicyanobenzene (**5**)

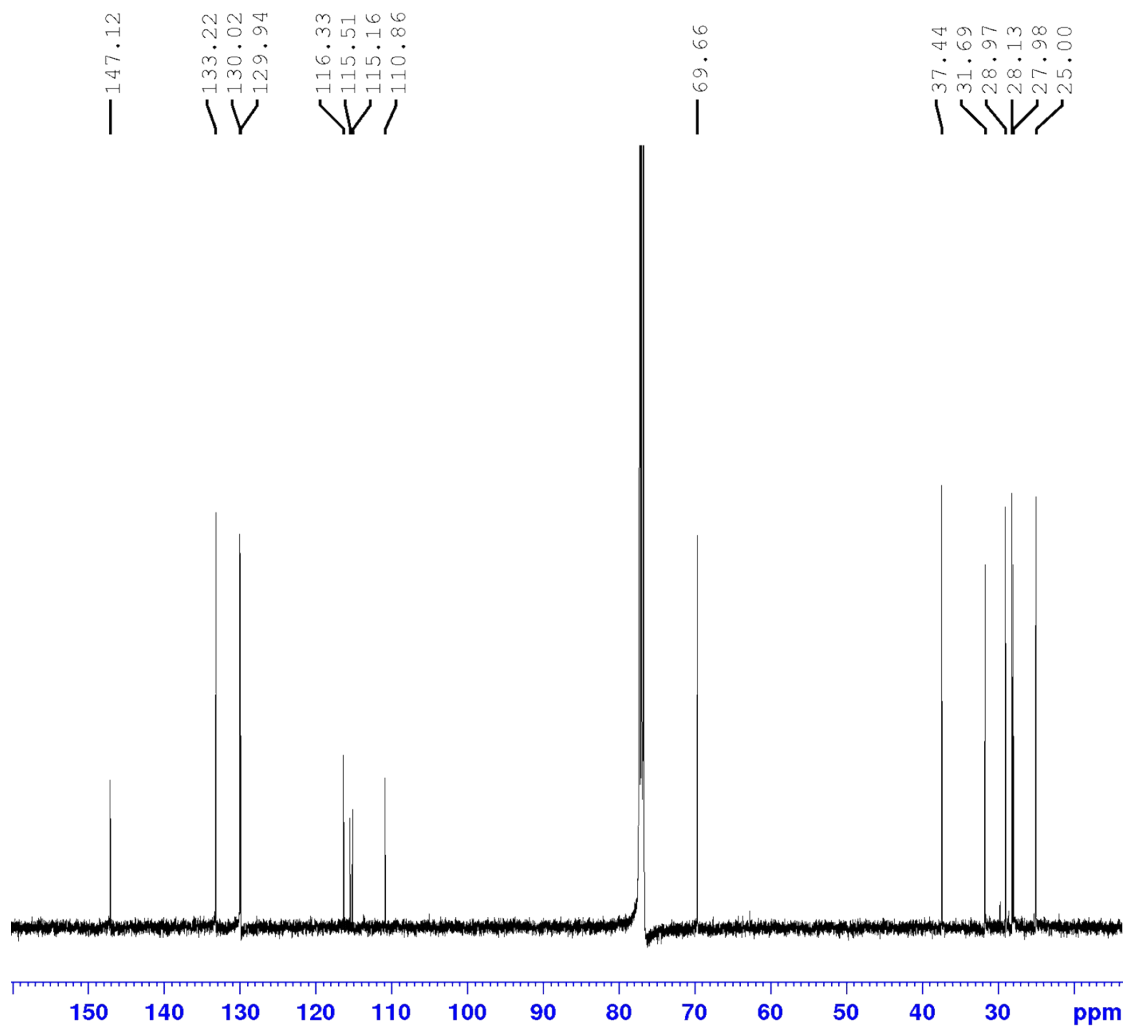

**Fig. S15**  $^{13}\text{C}$ -NMR spectrum of 4-(6-methanesulfonatehexylsulfanyl)-1,2-dicyanobenzene (**5**)

MA\_30 #73 RT: 1.44 AV: 1 NL: 7.41E7  
T: +c ESI Q1MS [100.000-400.000]

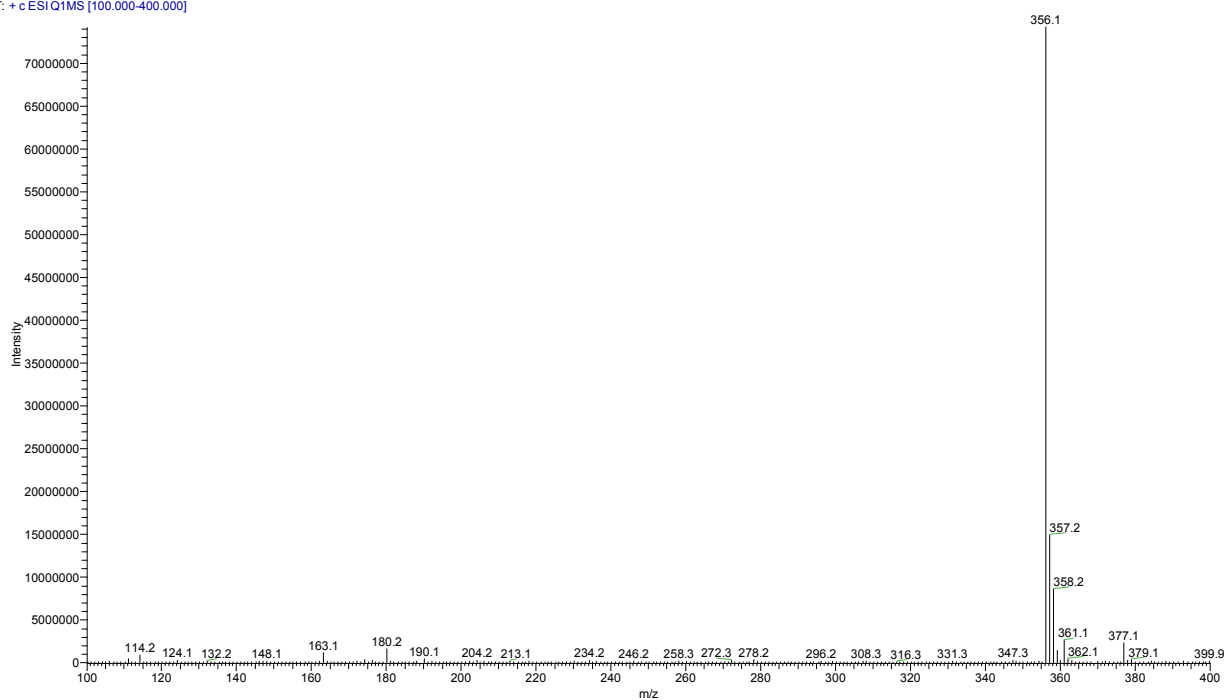

**Fig. S16** Mass spectrum of 4-(6-methanesulfonatehexylsulfanyl)-1,2-dicyanobenzene (**5**)

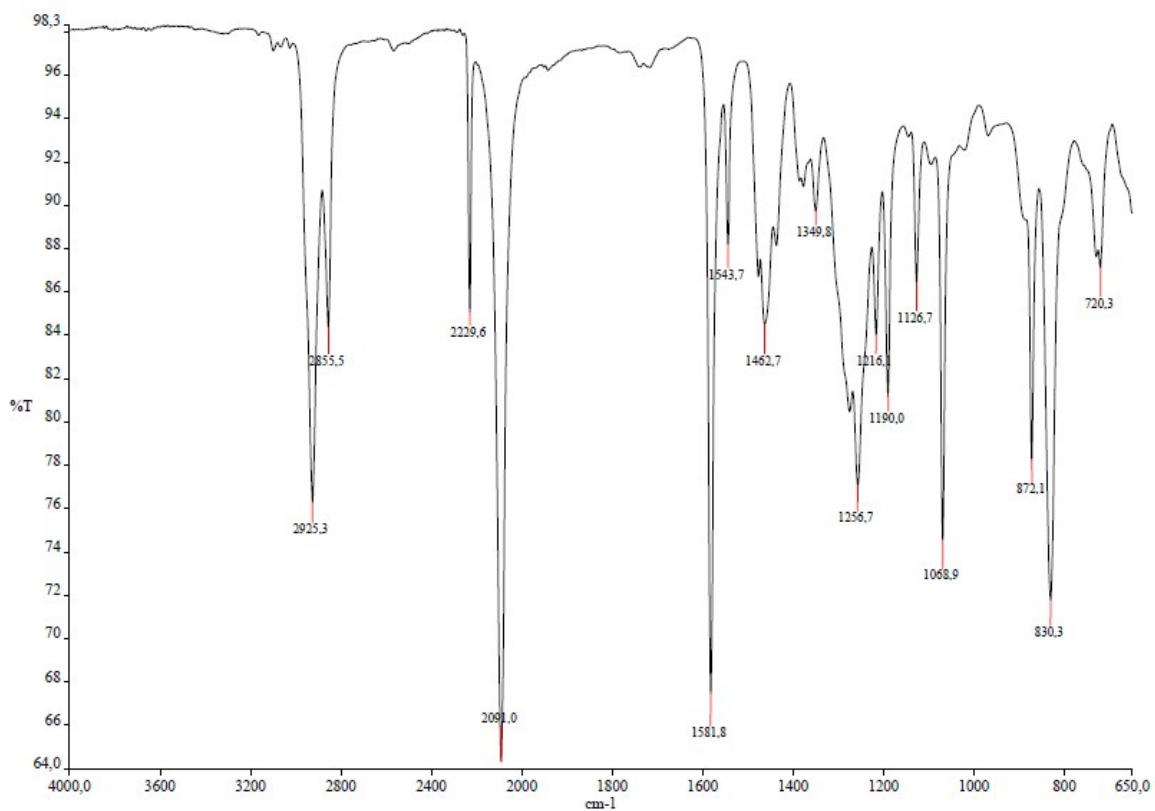

**Fig. S17** FT-IR spectrum of 4-(6-azidohexylsulfanyl)-1,2-dicyanobenzene (**6**)

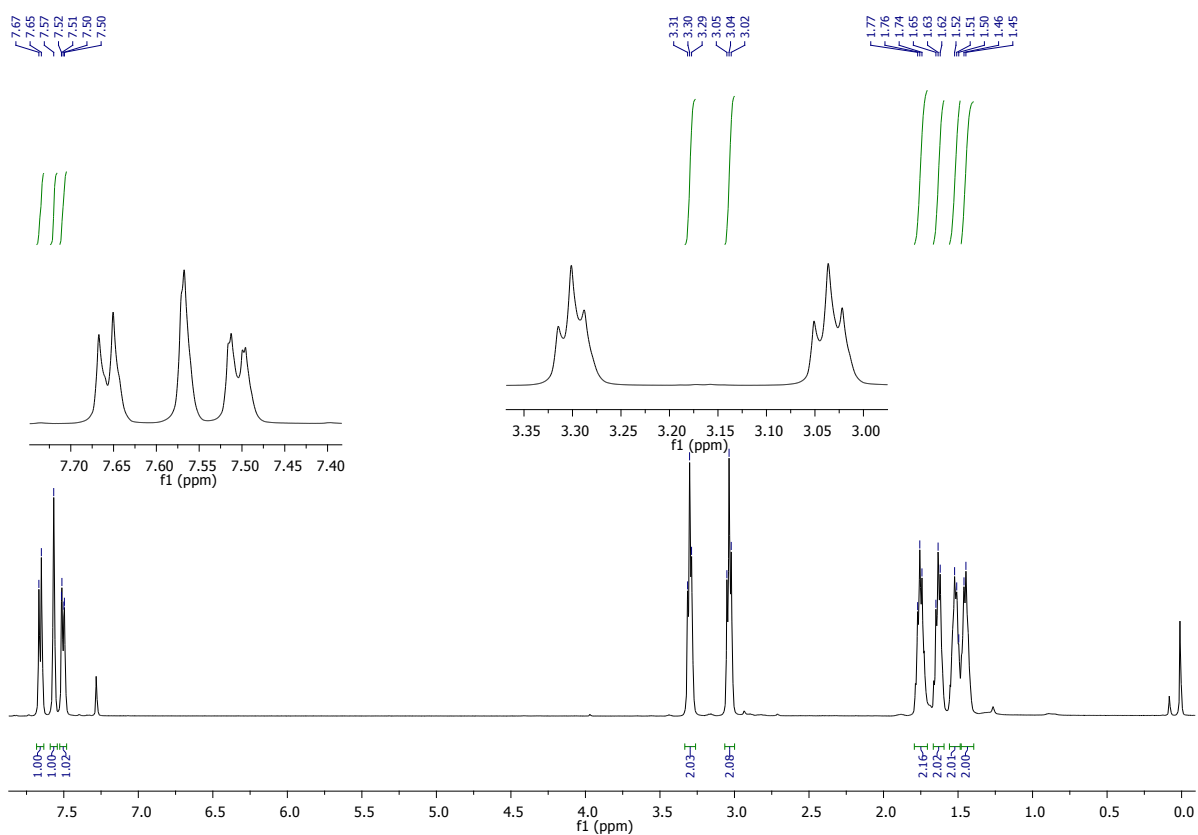

**Fig. S18**  $^1\text{H-NMR}$  spectrum of 4-(6-azidohexylsulfanyl)-1,2-dicyanobenzene (**6**)

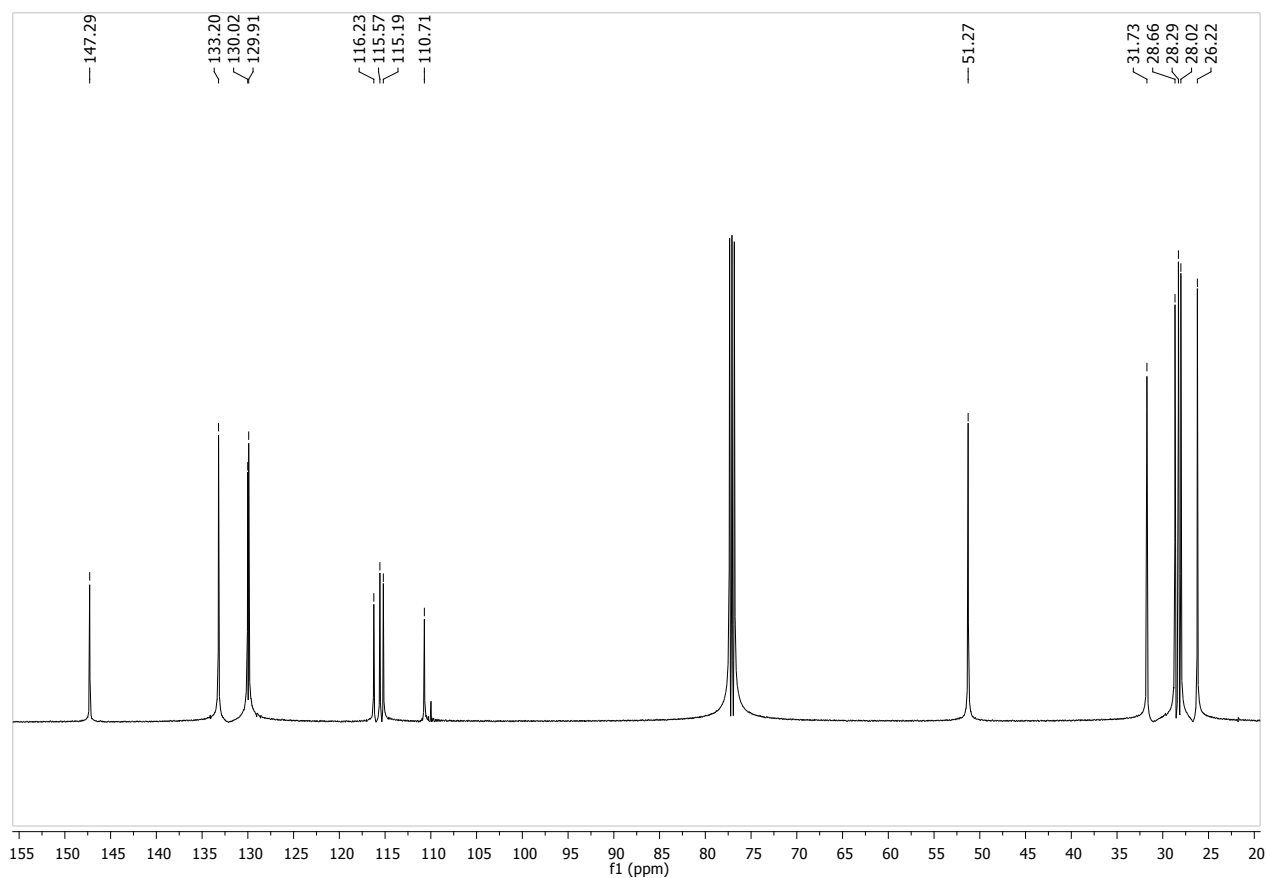

**Fig. S19**  $^{13}\text{C}$ -NMR spectrum of 4-(6-azidohexylsulfanyl)-1,2-dicyanobenzene (**6**)

MA\_29 #28 RT: 0.54 AV: 1 NL: 1.84E7  
T: +c ESIQ1MS [100.000-400.000]

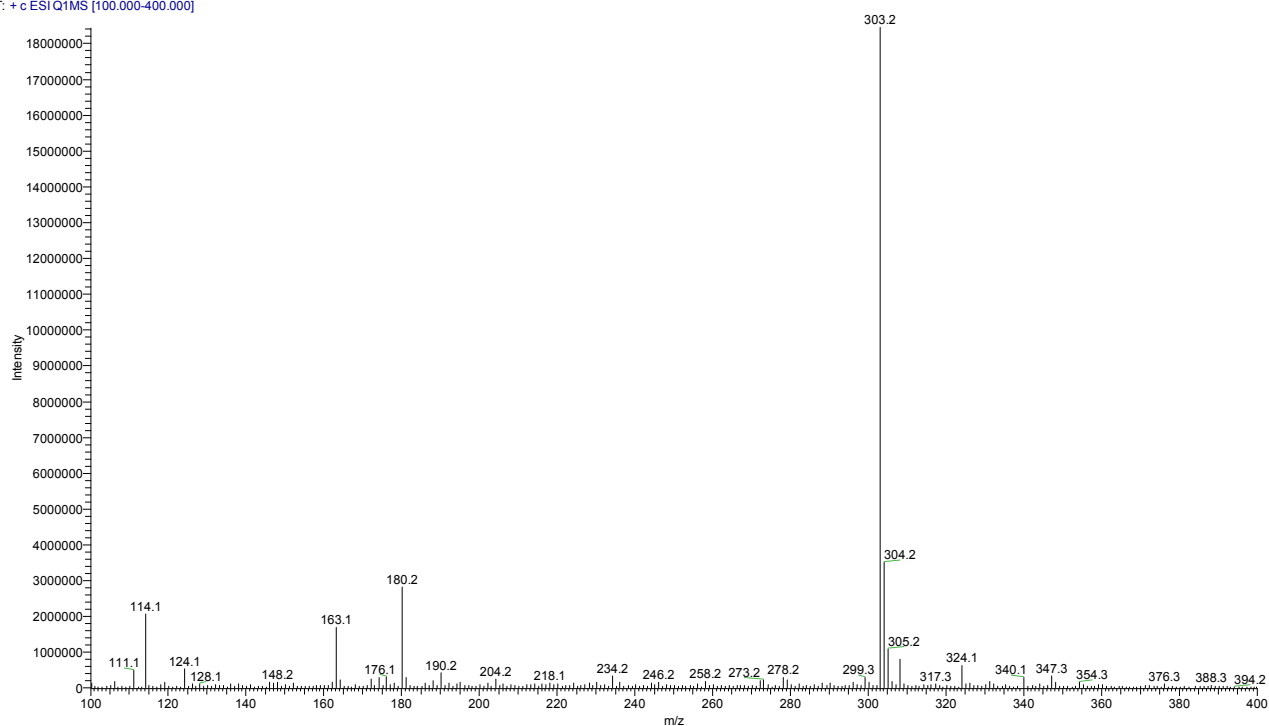

**Fig. S20** Mass spectrum of 4-(6-azidohexylsulfanyl)-1,2-dicyanobenzene (**6**)

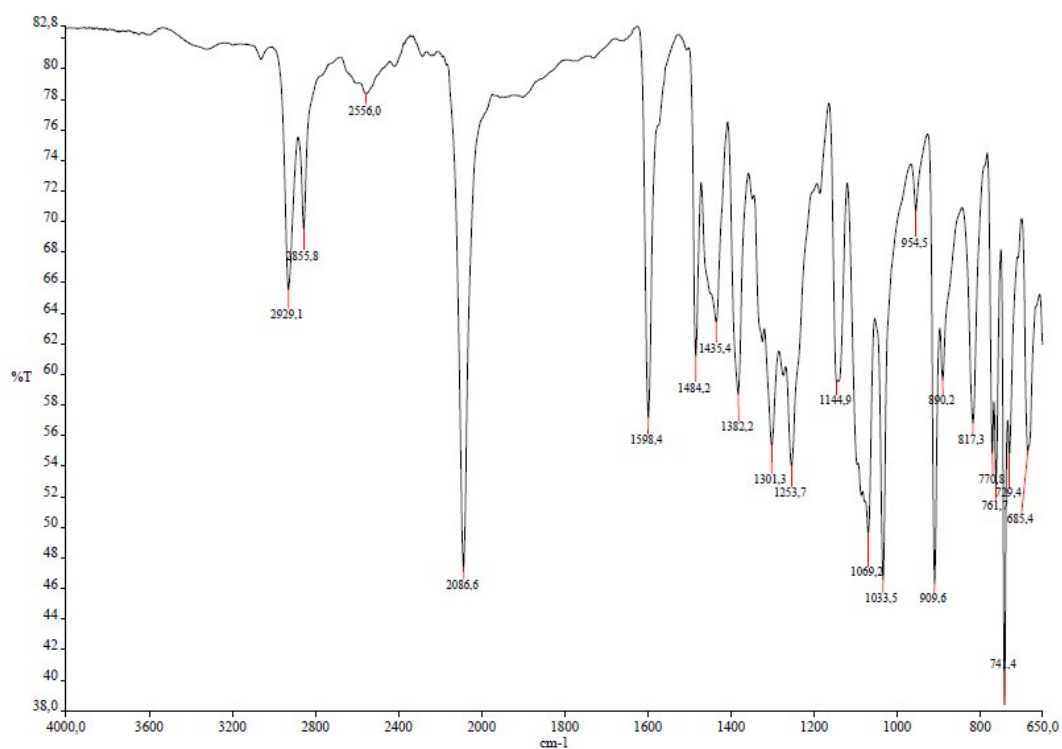

**Fig. S21** FT-IR spectrum of compound 7

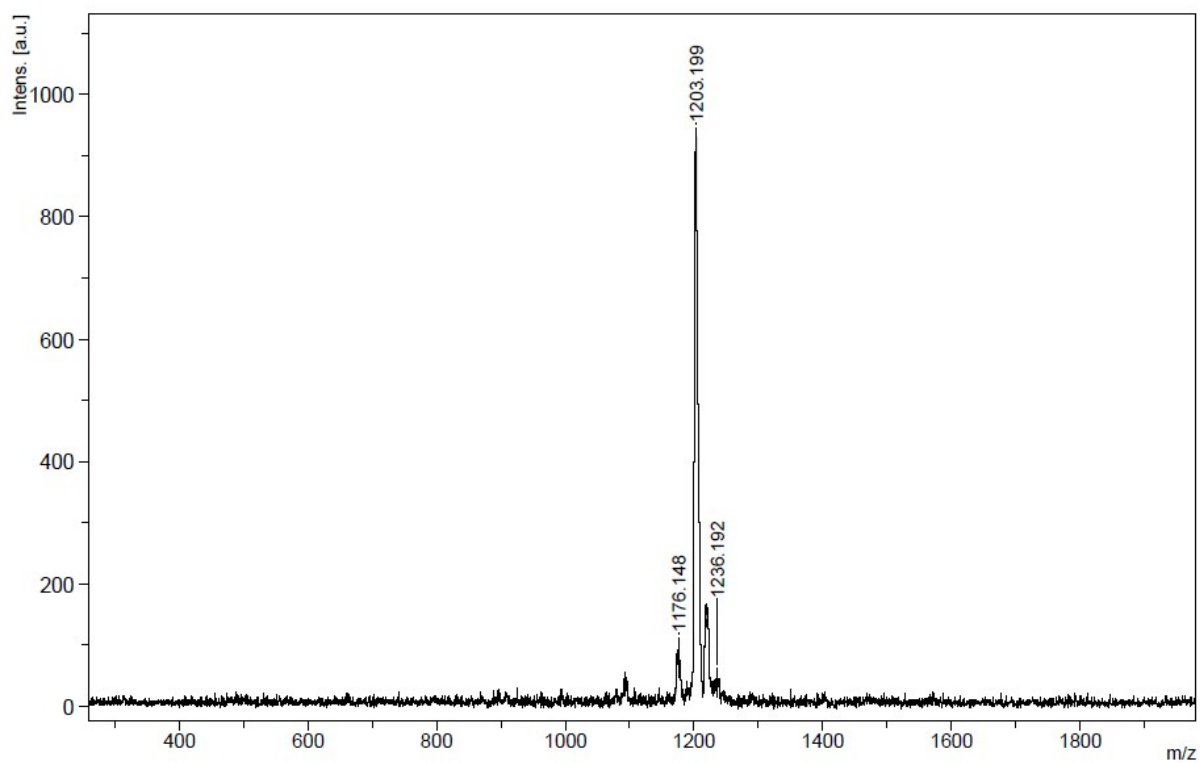

**Fig. S22** mass spectrum of compound 7



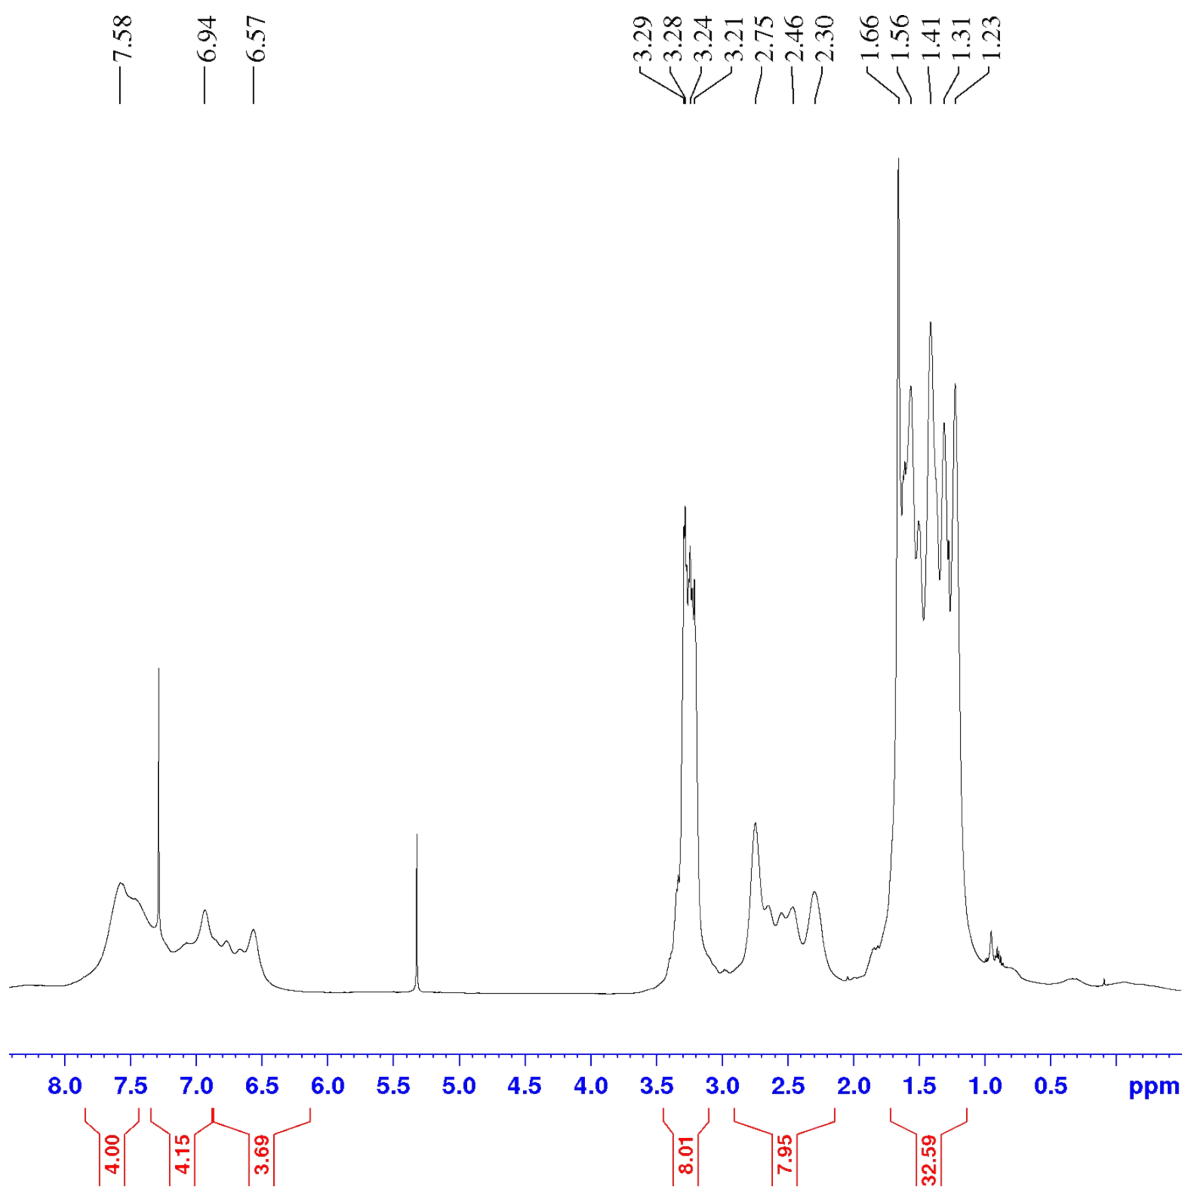

Fig. S23  $^1\text{H}$ -NMR spectrum of compound **7** in  $\text{CDCl}_3$

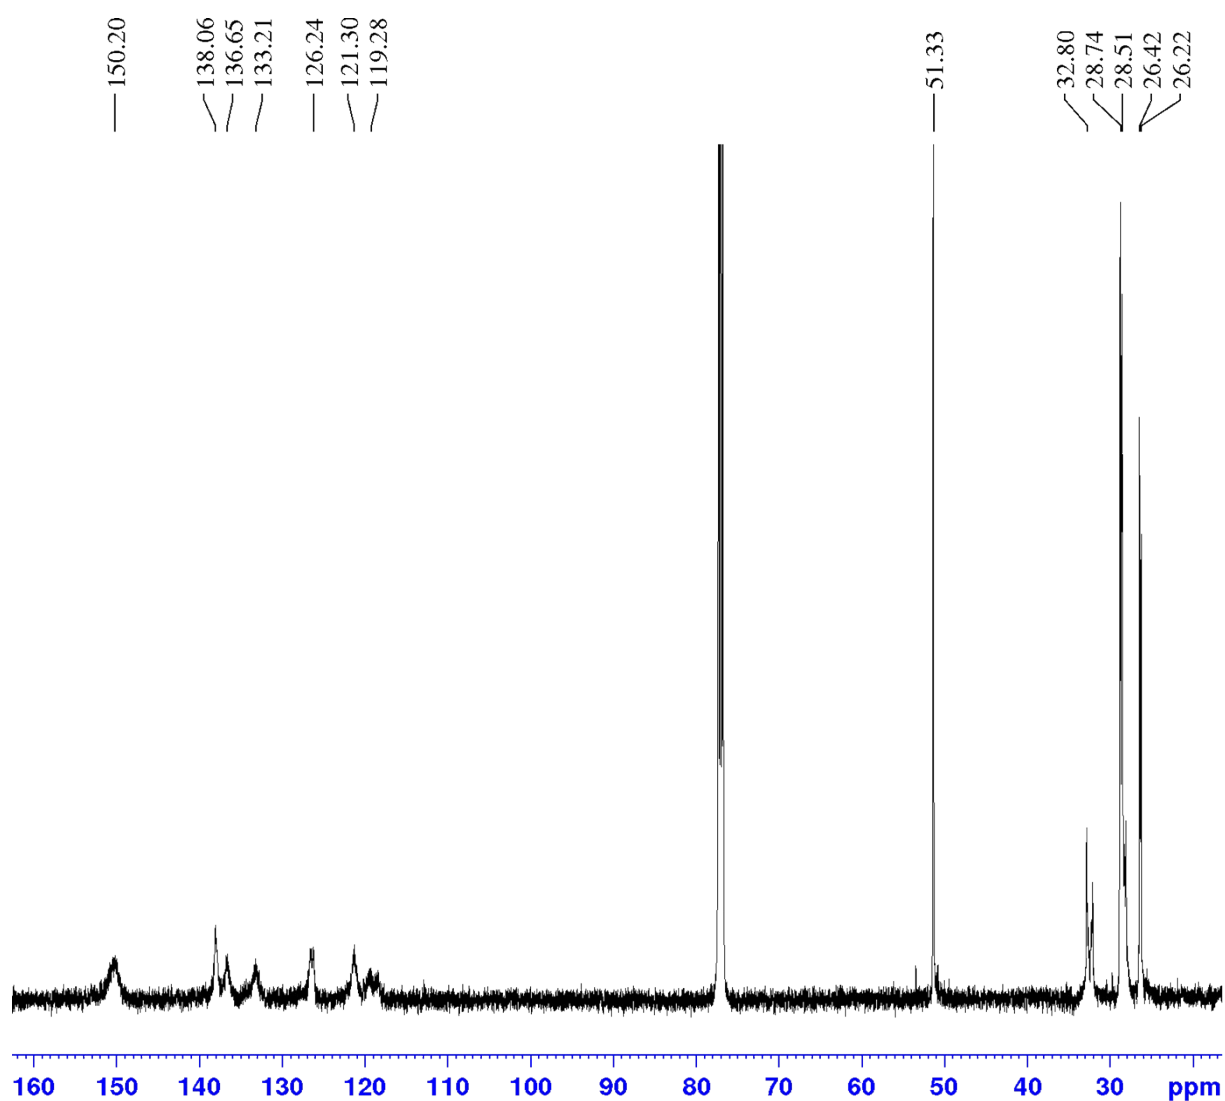

Fig. S24  $^{13}\text{C}$ -NMR spectrum of compound 7 in  $\text{CDCl}_3$

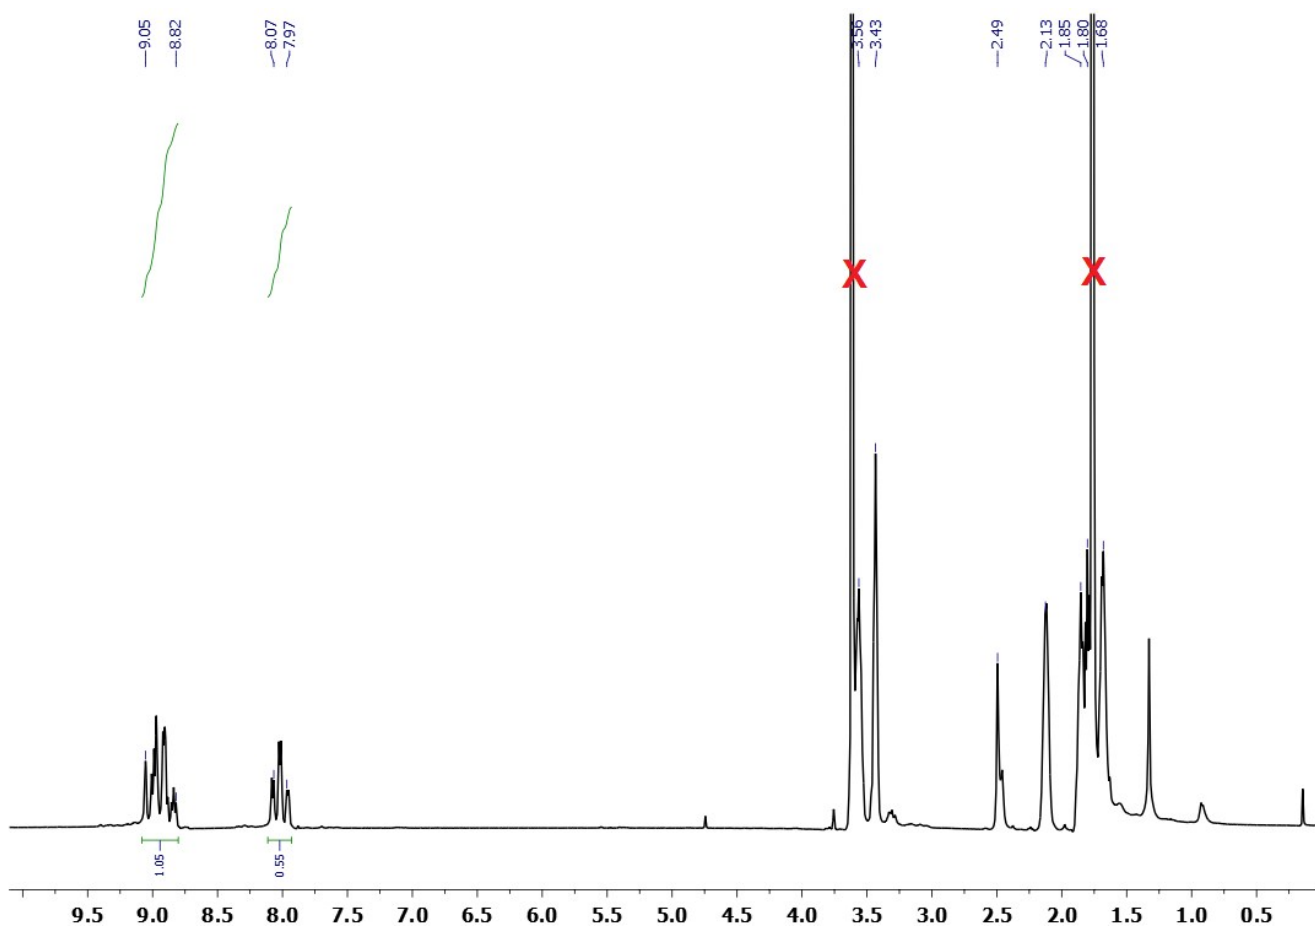

Fig. S25  $^1\text{H-NMR}$  spectrum of compound 7 in  $\text{THF-}d_8$

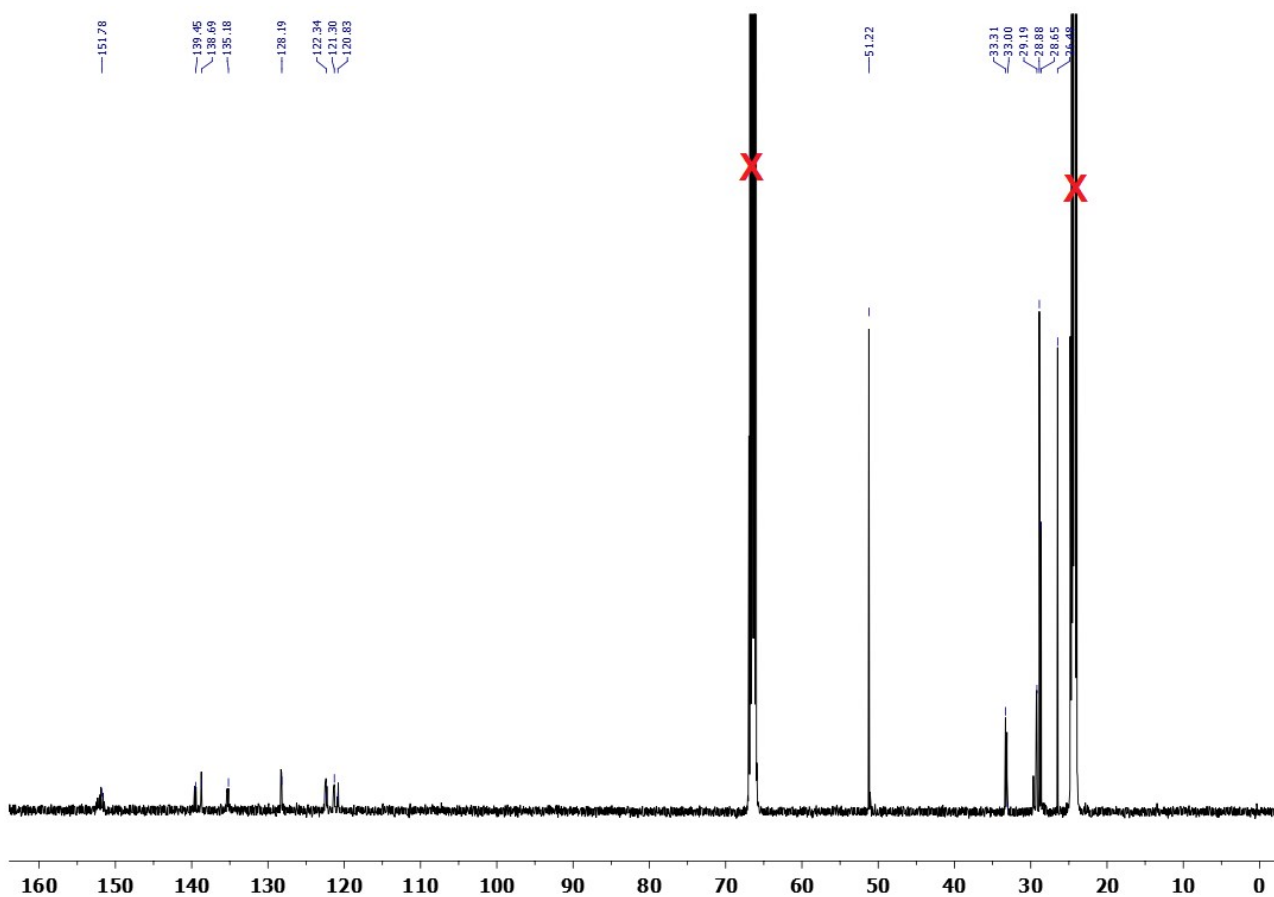

Fig. S26  $^{13}\text{C}$ -NMR spectrum of compound 7 in  $\text{THF-}d_8$

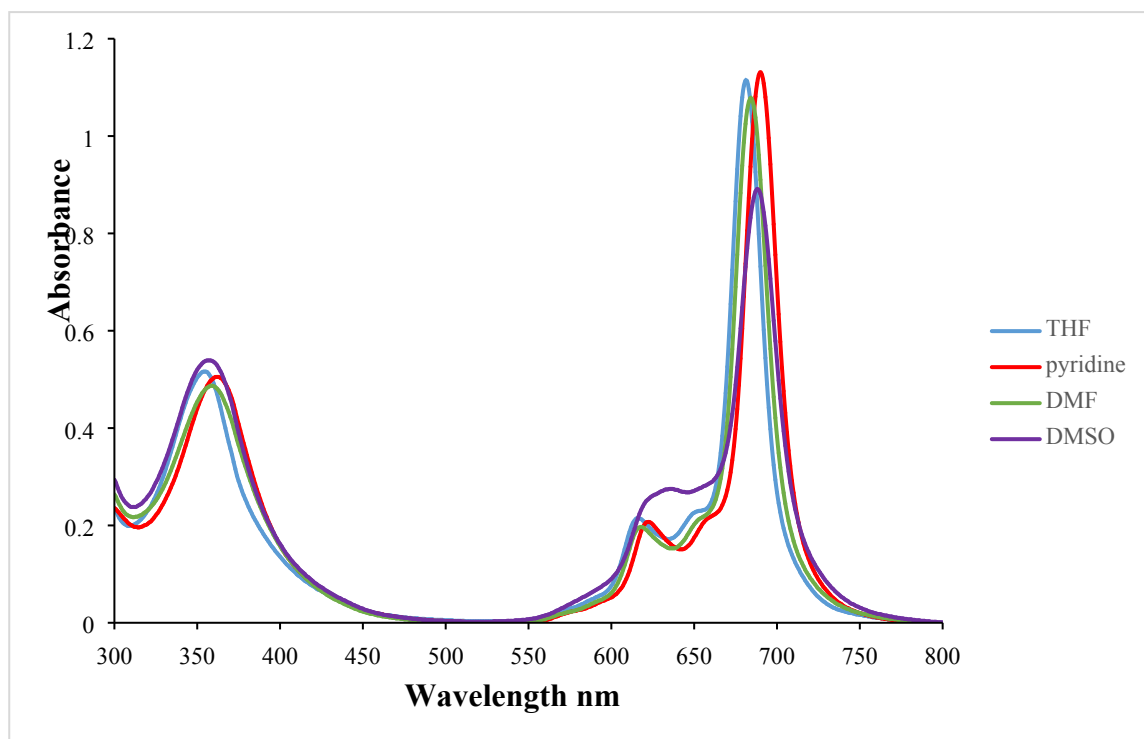

Fig. S27 Absorption spectra of 3 in DMF, pyridine, THF and DMSO at the same concentration ( $10^{-5}$  M).

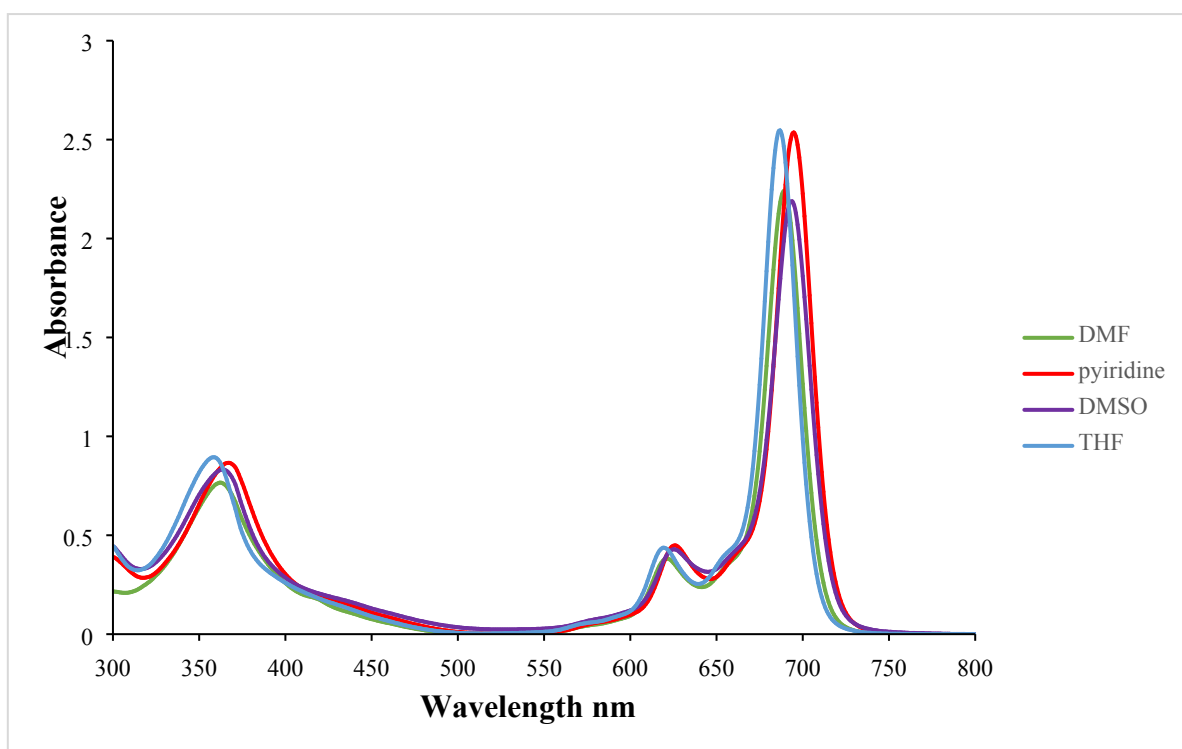

**Fig. S28** Absorption spectra of **7** in DMF, pyridine, THF and DMSO at the same concentration ( $10^{-5}$  M).

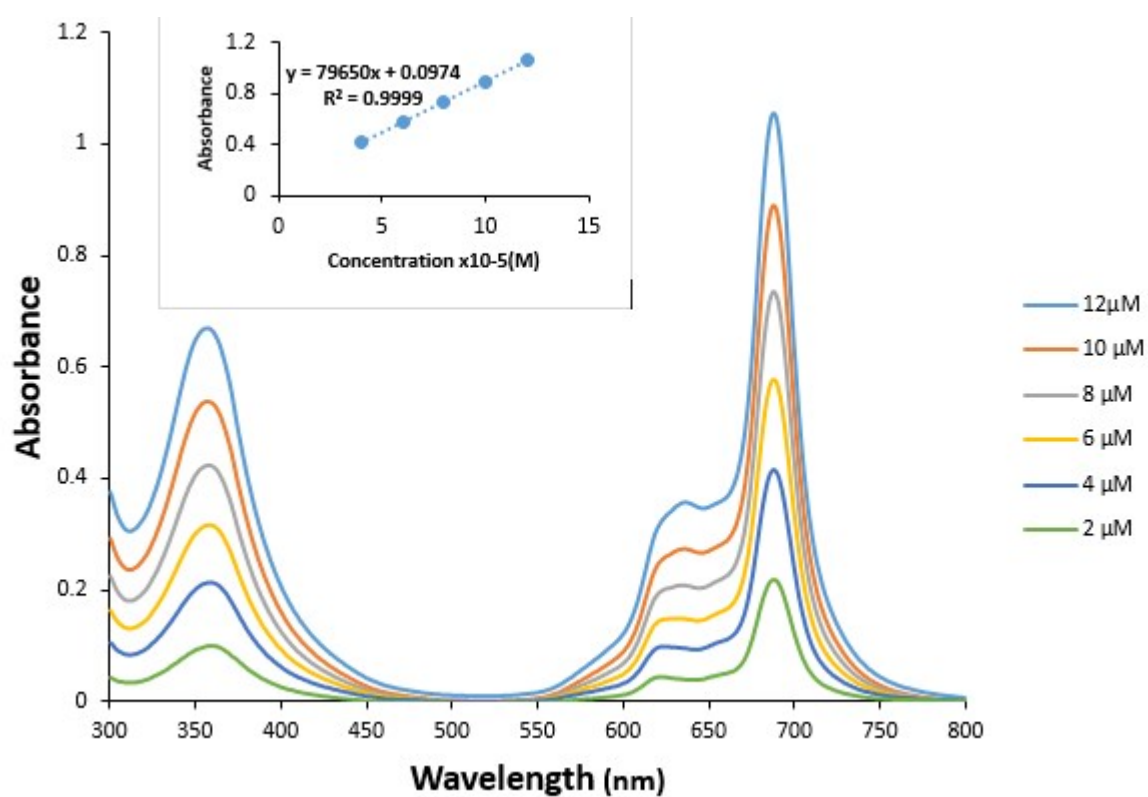

**Fig. S29** UV-Vis spectra of compound **3** at the different concentrations in DMSO.

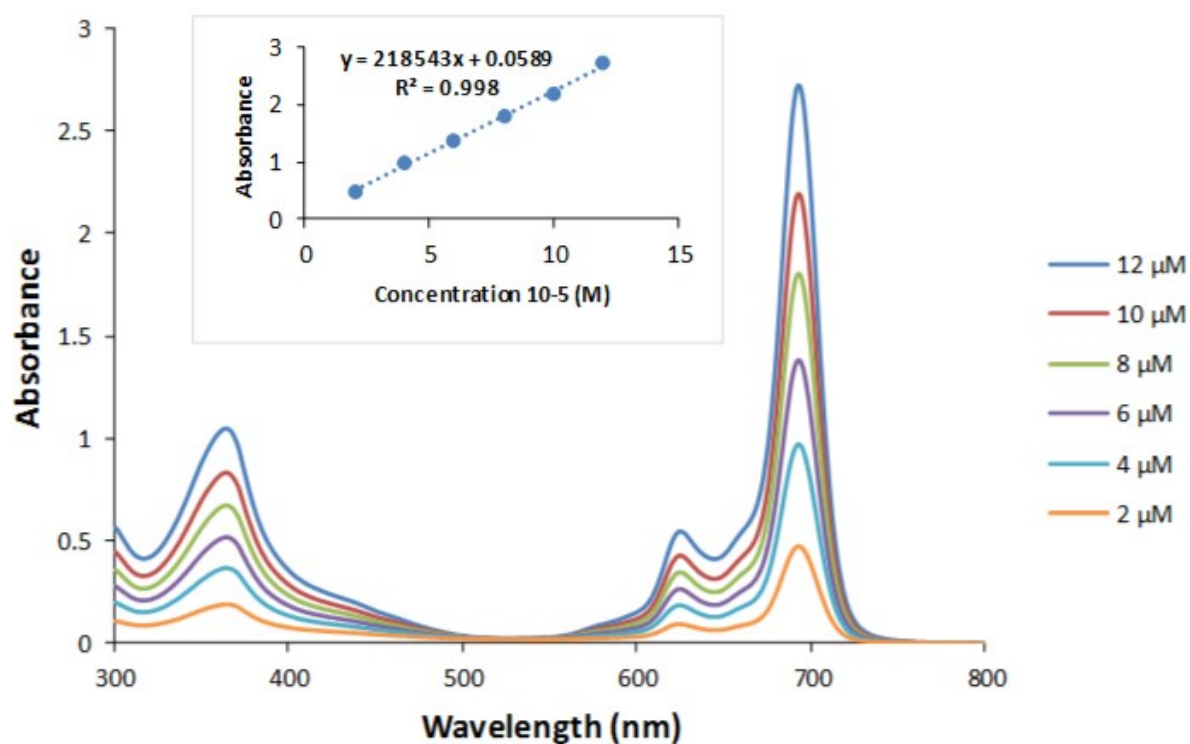

**Fig. S30** UV-Vis spectra of compound **7** at the different concentrations in DMSO

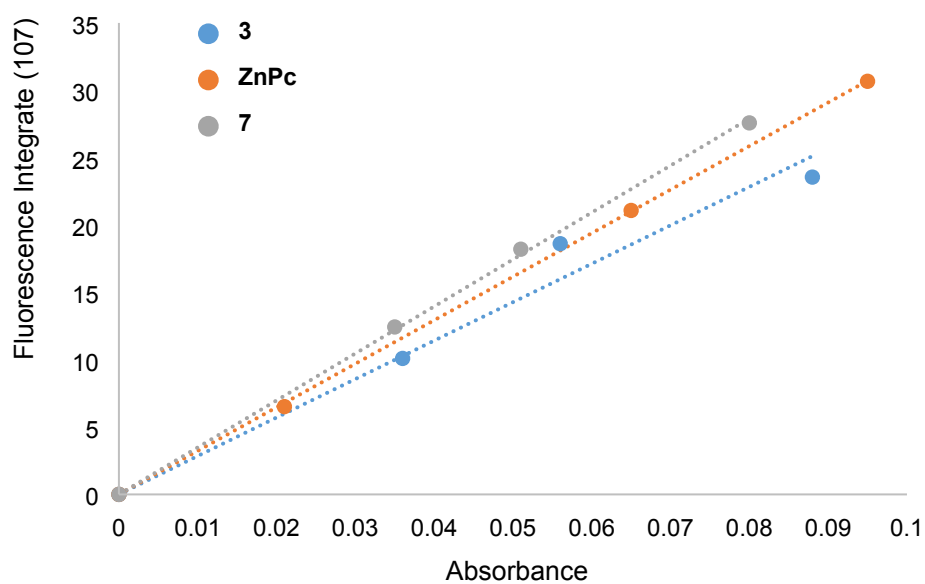

**Fig. S31** Fluorescence integrate area vs absorbance of **3**, **7** and **ZnPc** in DMSO to determine their  $\Phi_F$  values

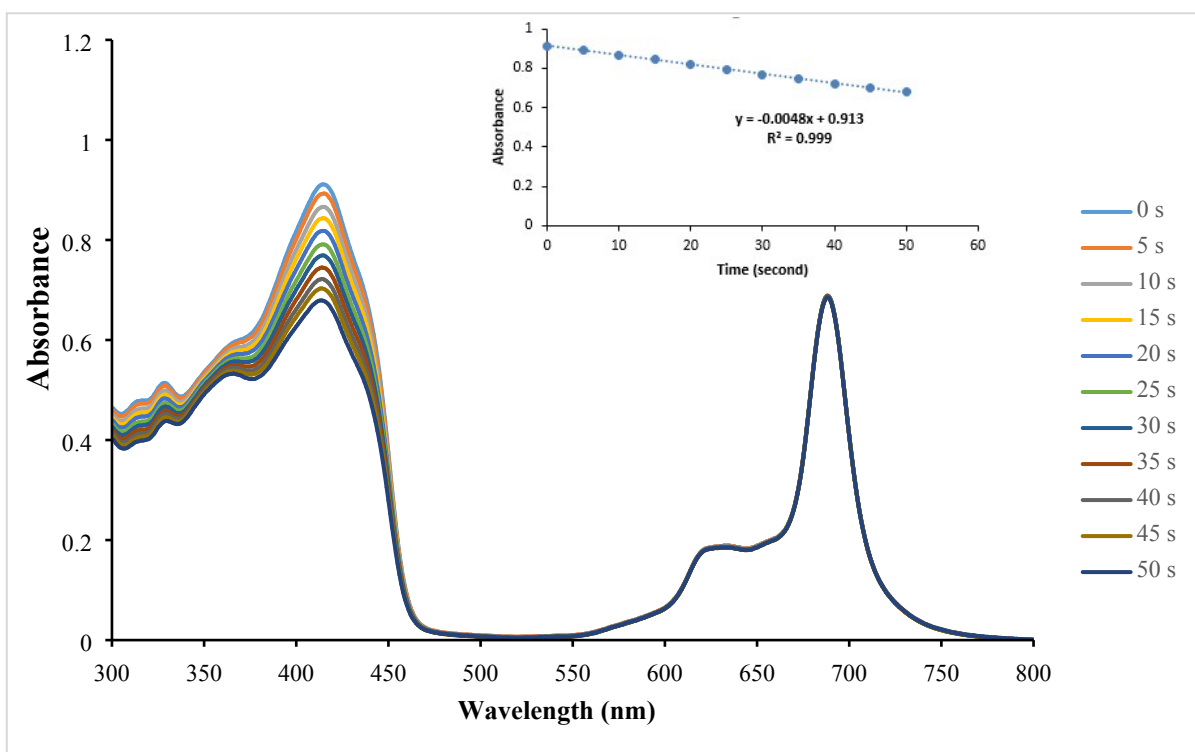

**Fig. S32** Determination of singlet oxygen quantum yield of **3** in DMSO. Inset: Plot of DPBF absorbance at 417 nm

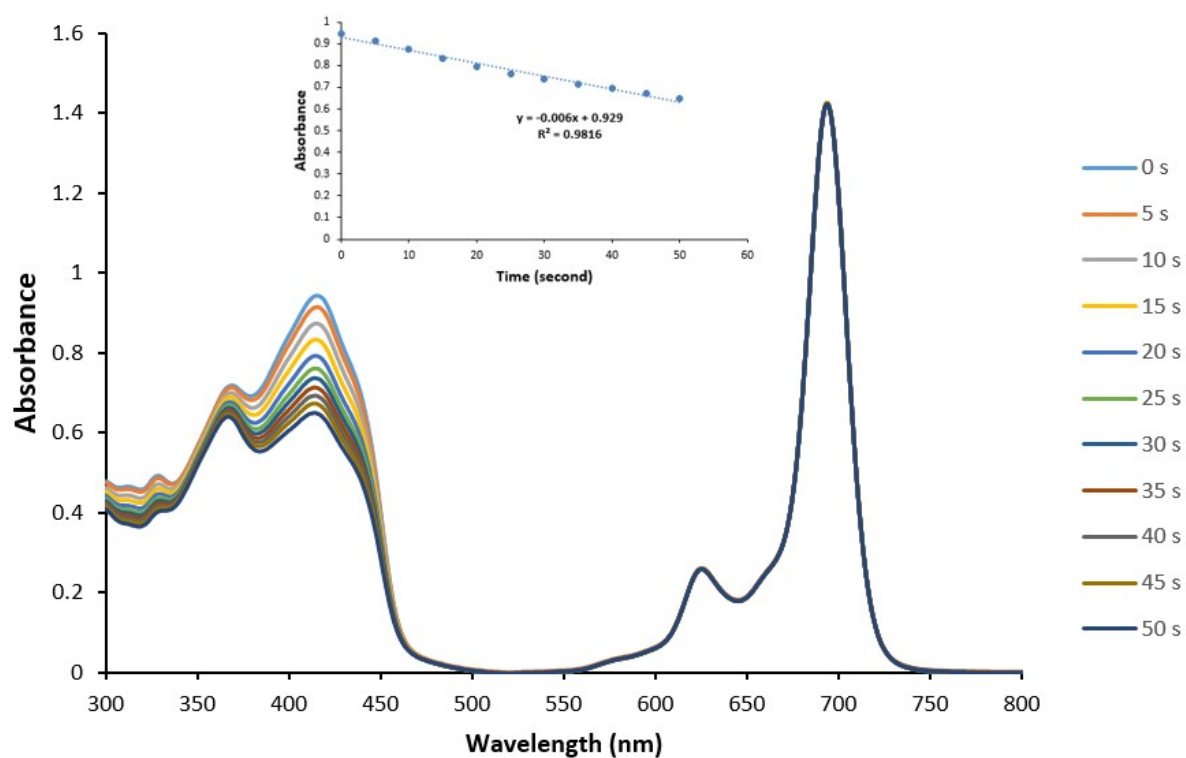

**Fig. S33** Determination of singlet oxygen quantum yield of **7** in DMSO. Inset: Plot of DPBF absorbance at 417 nm

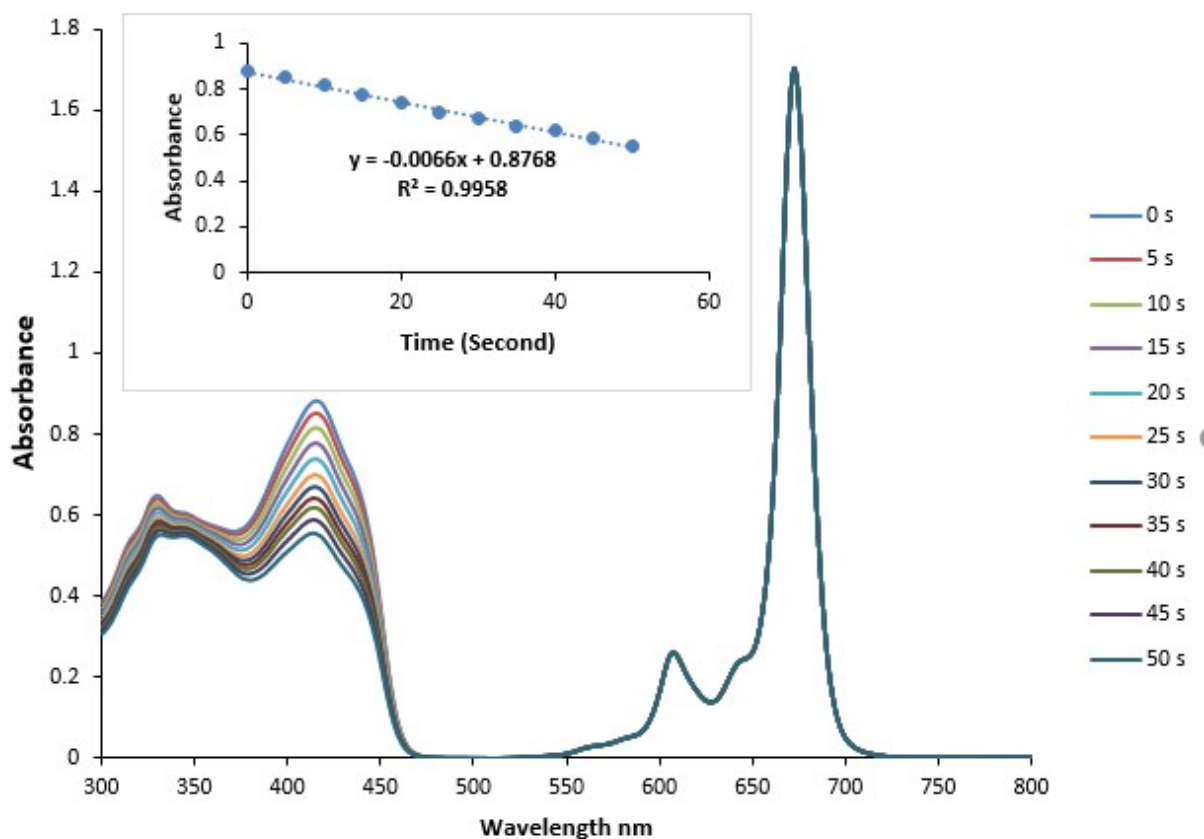

**Fig. S34** Determination of singlet oxygen quantum yield of **ZnPc** in DMSO. Inset: Plot of DPBF absorbance at 417 nm

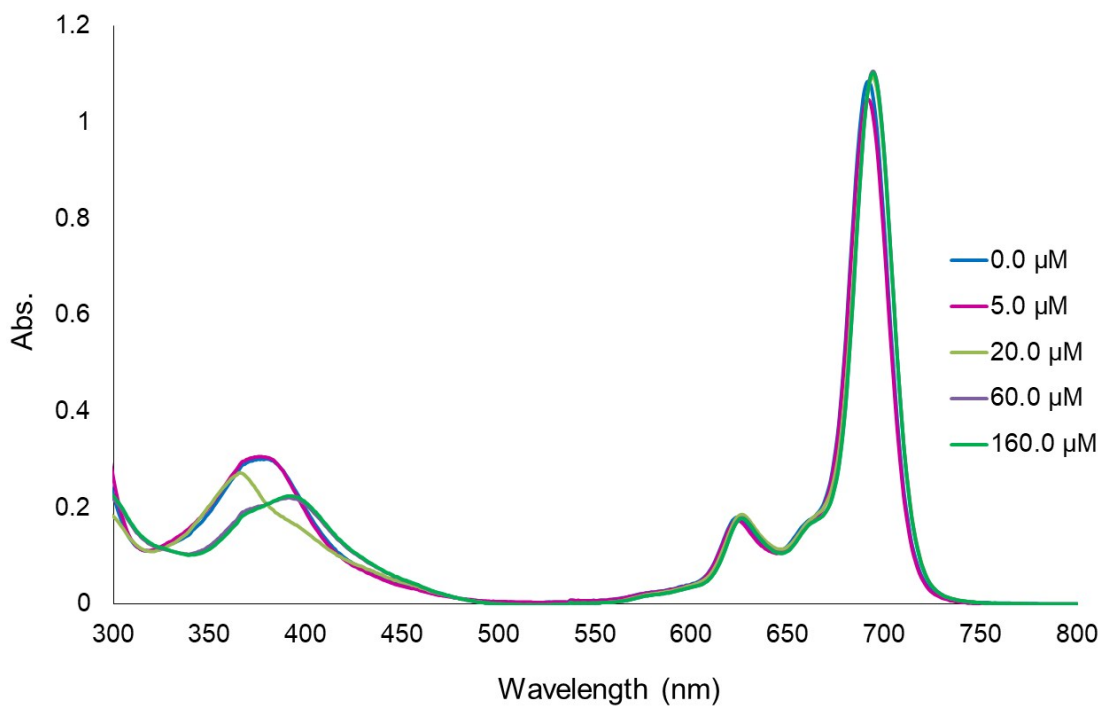

**Fig. S35** Changes in the absorption spectra of compound **7** ( $5.0 \times 10^{-7}$  M) in DMSO by the addition of hydrogen sulfide ( $\text{Na}_2\text{S} \cdot 9\text{H}_2\text{O}$  in HEPES/ DMSO (5:5, pH= 7.0)).



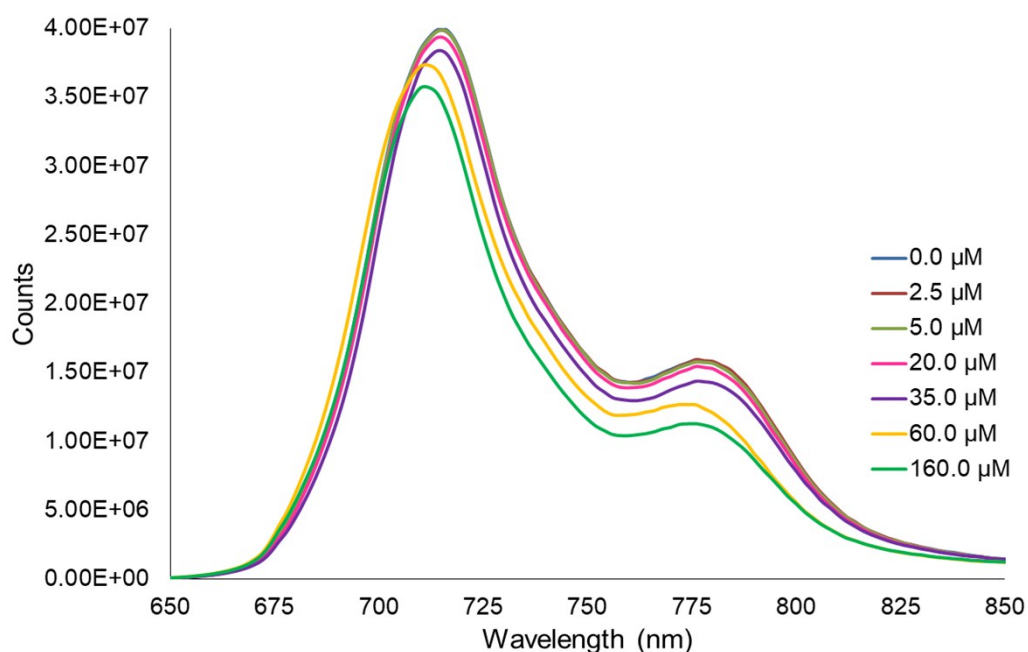

**Fig. S36** Changes in the emission spectra of compound **7** ( $5.0 \times 10^{-7}$  M) in DMSO by the addition of hydrogen sulfide ( $\text{Na}_2\text{S} \cdot 9\text{H}_2\text{O}$  in HEPES/ DMSO (5:5, pH= 7.0))

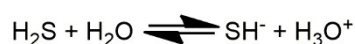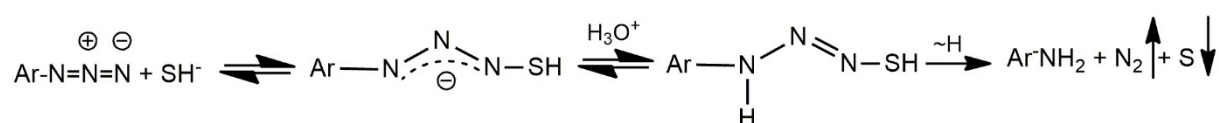

**Fig. S37.** Proposed mechanism for reduction of azide group to amine group [1,2].

## References

- [1] Gronowitz S, Westerlund C, Hörnfeldt AB, The synthetic utility of heteroaromatic azido compounds. I. Preparation and reduction of some 3-azido-2-substituted furans, thiophenes and selenophenes. *Acta Chem. Scand., Ser. B* 1975; *B29*: 224-32.
- [2] Ozdemir T, Sozmen F, Mamur S, Tekinay T, Akkaya EU. Fast responding and selective near-IR Bodipy dye for hydrogen sulfide sensing. *Chem Commun.* 2014;50:5455–57.

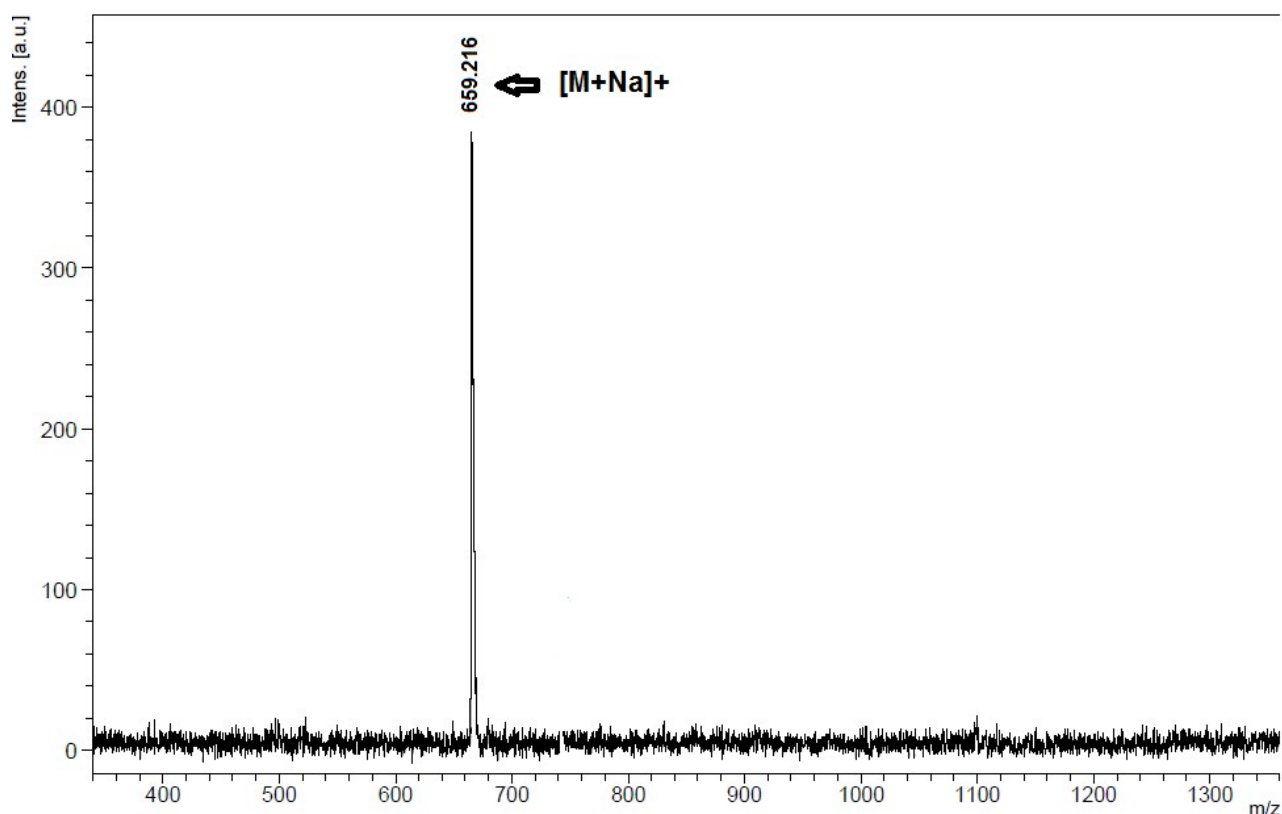

**Fig. S38** MALDI-TOF mass spectrum of 2,9(10),16(17),23(24) (amino) phthalocyaninato zinc (II) (**Pc-NH<sub>2</sub>**). It is obtained the reaction of 500  $\mu$ M compound **3** with 10 mM Na<sub>2</sub>S

#### Synthesis of tetra 2,9(10),16(17),23(24) (amino) phthalocyaninato zinc (II) (**Pc-NH<sub>2</sub>**)

Sodium sulfide nonahydrate (48 mg, 0.2 mmol) was added to the solution of compound **3** (15 mg, 0.02 mmol) in 5 mL DMSO/H<sub>2</sub>O (v/v 9:1) mix-solvent. The mixture was stirred for 1.5 h at room temperature in the dark. The reaction mixture was poured into 100 mL of water. The resulting dark green precipitate collected by centrifugation. The product was washed with hot ethanol, ethyl acetate, DCM, and diethyl ether, and dried in *vacuo* over P<sub>2</sub>O<sub>5</sub> to give 11.2 mg of **Pc-NH<sub>2</sub>**, yield: 86.97%. FT-IR [(ATR)  $\nu_{\max}/\text{cm}^{-1}$ ]: 3328.9, 3203.7, 1605.6, 1492.9, 1454.3, 1405.9, 1345.6, 1252.3, 1134.4, 1090.8, 1045.9, 940.5, 822.8, 719.9  $\text{cm}^{-1}$ . <sup>1</sup>H NMR (500 MHz, DMSO-*d*<sub>6</sub>, ppm):  $\delta$  8.93(d, 4H, ArH), 8.42 (d, 4H, ArH), 7.37 (s, 4H, ArH), 6.22 (br s, 8H, NH). MALDI-TOF-MS *m/z*: 637.466 [M+H]<sup>+</sup>, 663.590[M+4H+Na]<sup>+</sup>, 689.726[M+2(4H+Na)]<sup>+</sup>, 862.128 [M+DIT]<sup>+</sup>.

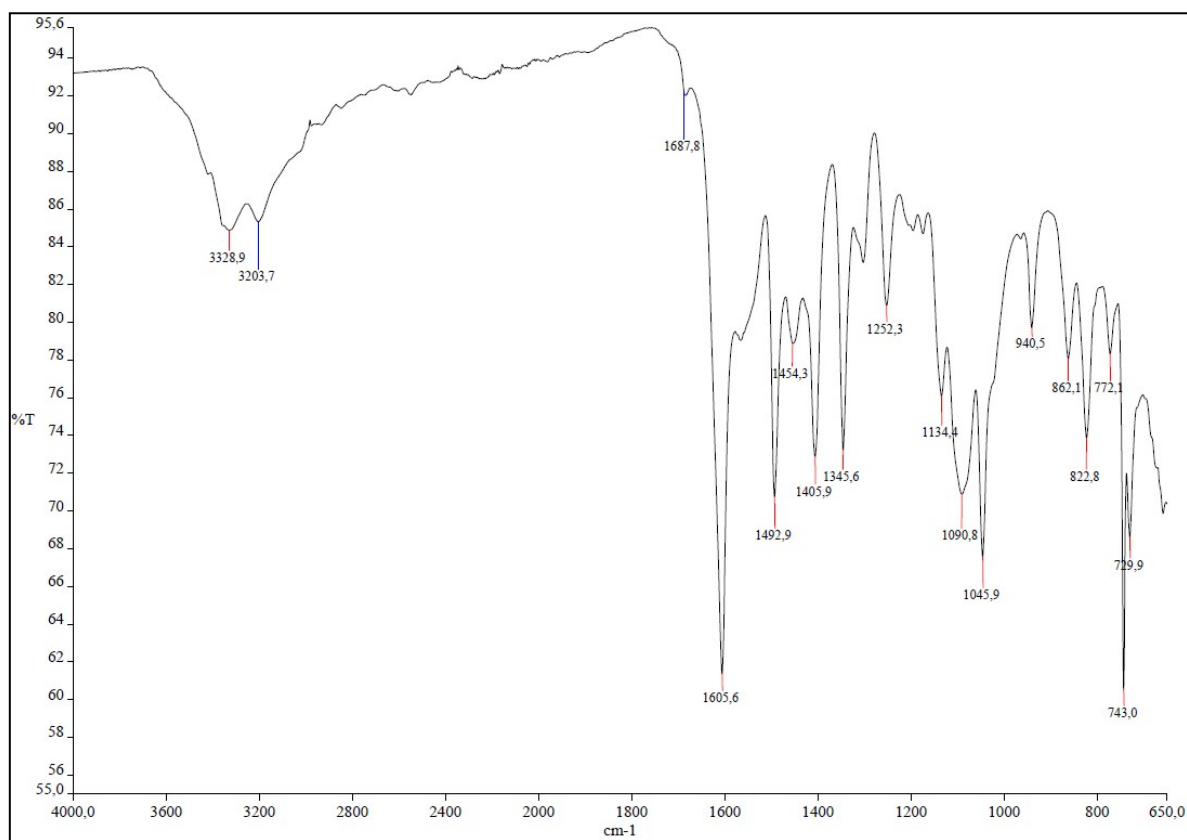

**Fig. S39** FT-IR spectrum of 2,9(10),16(17),23(24) (amino) phthalocyaninato zinc (II) (**Pc-NH<sub>2</sub>**)

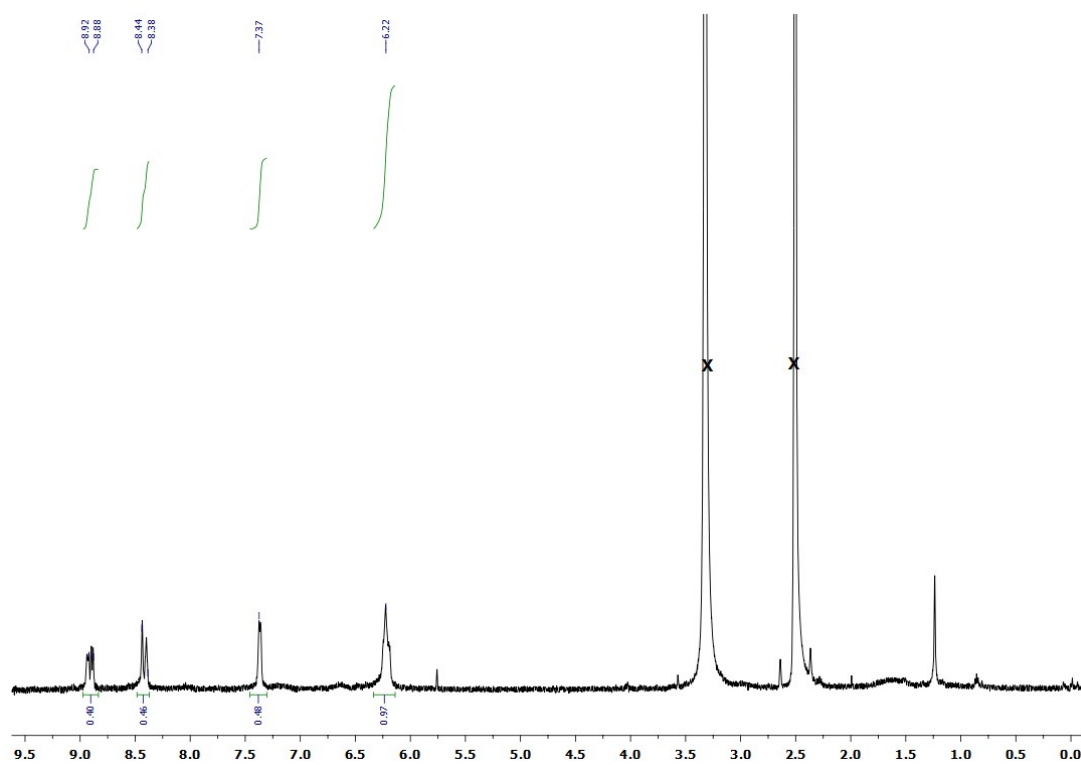

**Fig. S40** <sup>1</sup>H-NMR spectrum of 2,9(10),16(17),23(24) (amino) phthalocyaninato zinc (II) (**Pc-NH<sub>2</sub>**) in DMSO-*d*<sub>6</sub>

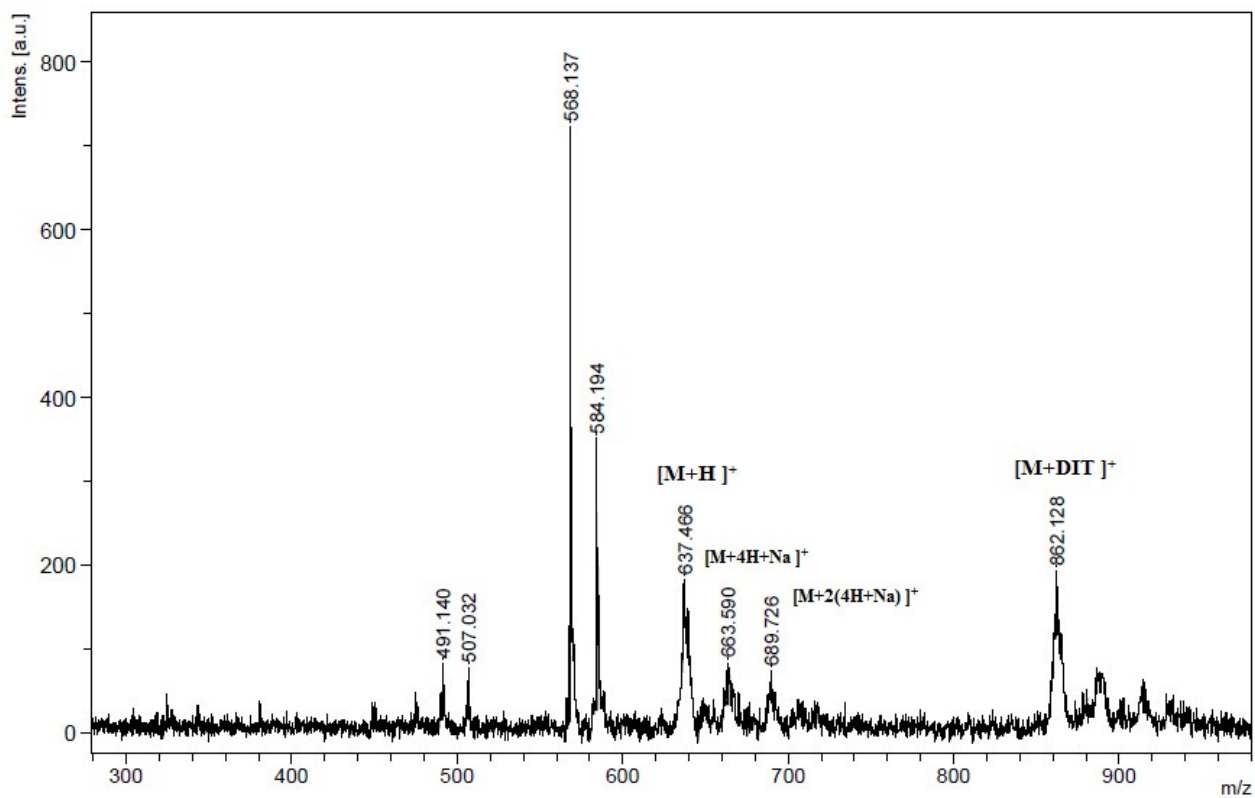

**Fig. S41** MALDI-TOF mass spectrum of 2,9(10),16(17),23(24) (amino) phthalocyaninato zinc (II) (**Pc-NH<sub>2</sub>**) (matrix: DIT)
